1

2

3

4

5 **A mutant bacteriophage evolved to infect resistant bacteria gained a broader**  
6 **host range**

7

8

9 Michal Habusha<sup>1,2</sup>, Elhanan Tzipilevich<sup>1,2</sup> and Sigal Ben-Yehuda<sup>1,3</sup>

10

11

12

13

14

15

16

17

18 <sup>1</sup>Department of Microbiology and Molecular Genetics

19 Institute for Medical Research Israel-Canada

20 The Hebrew University-Hadassah Medical School, POB 12272

21 The Hebrew University of Jerusalem, 91120

22 Jerusalem, Israel

23

24 <sup>2</sup>These authors contributed equally to this work.

25

26 <sup>3</sup>To whom correspondence should be addressed: E-mail: [sigalb@ekmd.huji.ac.il](mailto:sigalb@ekmd.huji.ac.il)

27

28

29

30

31 **Running Title: A mutant bacteriophage gained a broader host range**

32

33

1 **Summary (200 words)**

2 Bacteriophages (phages) are the most abundant entities in nature, yet little is known  
3 about their capacity to acquire new hosts and invade new niches. By exploiting the  
4 Gram positive soil bacterium *Bacillus subtilis* (*B. subtilis*) and its lytic phage SPO1 as  
5 a model, we followed the co-evolution of bacteria and phages. After infection, phage  
6 resistant bacteria were readily isolated. These bacteria were defective in production of  
7 glycosylated wall teichoic acid (TA) polymers, served as SPO1 receptor.  
8 Subsequently, a SPO1 mutant phage that could infect the resistant bacteria evolved.  
9 The emerging phage contained mutations in two genes, encoding the baseplate and  
10 fibers required for host attachment. Remarkably, the mutant phage gained the capacity  
11 to infect non-host *Bacillus* species that are not infected by the wild type phage. We  
12 provide evidence that the evolved phage lost its dependency on the species specific  
13 glycosylation pattern of TA polymers. Instead, the mutant phage gained the capacity  
14 to directly adhere to the TA backbone, conserved among different species, thereby  
15 crossing the species barrier.

16

17

18

19 **Key words:** *Bacillus subtilis*, Bacteriophages, lytic cycle, bacteriophage resistance,  
20 host range

21

22

## 1 **Introduction**

2 Bacteriophages (phages) and their bacterial host display a constant evolutionary  
3 battle, leading to the emergence of mutations in both competing participants. Phage  
4 infection is initiated by the binding of phage tail proteins, to phage receptors located  
5 on the surface of the bacterial host (Rakhuba et al., 2010). The primary contact of the  
6 phage with the bacterial surface is often reversible, increasing the potential for the  
7 subsequent irreversible attachment to a second receptor, leading to DNA injection  
8 through the phage tail apparatus (Moldovan et al., 2007). The bacterial surface  
9 components show considerable variation among species, enabling highly specific  
10 interactions between phages and their target host (Koskella and Meaden, 2013). The  
11 Gram positive soil bacterium *Bacillus subtilis* (*B. subtilis*) contains surface polymers  
12 of teichoic acid (TA), a diverse family of cell surface glycopolymers containing  
13 phosphodiester-linked glycerol repeat units poly(Gro-P) (Sonenshein et al., 2002).  
14 The TA polymers can be either bound to the cytoplasmic membrane by a glycolipid  
15 anchor, lipoteichoic acid (LTA), or anchored to peptidoglycan (PG) through a N-  
16 acetylmannosaminyl  $\beta(1\rightarrow4)$  N-acetylglucosamine linkage unit, wall teichoic acid  
17 (WTA). The WTA linkage unit is synthesized by a sequential action of TagO, TagA  
18 and TagB enzymes (Brown *et al.*, 2013). WTA is further divided into two forms: the  
19 major form, which comprises glycerol phosphate polymer, and the minor form,  
20 composed of a polymer of glucose (Glc) and N-acetylgalactosamine (GalNAc)  
21 (Brown et al., 2013; Sonenshein et al., 2002). The major TA form is decorated by Glc,  
22 and the Glc-WTA polymer is exploited by various *B. subtilis* phages as a binding  
23 receptor [e.g. (Yasbin et al., 1976; Young, 1967)].

24 Here we investigated the *B. subtilis* lytic phage SPO1, known to utilize the  
25 major Glc-WTA as its sole receptor (Yasbin et al., 1976). SPO1 is a large tailed

1 bacteriophage from the *Myoviridae* family that harbors a genome of about 132 kb  
2 encased in a capsid of 87 nm in diameter (Parker et al., 1983; Stewart et al., 2009).  
3 *Myoviridae* phages exhibit a highly complex tail structure, consisting of a sheath, an  
4 internal tail tube, and a baseplate that holds the tail fibers (Fokine and Rossmann,  
5 2014; Stewart et al., 2009). In general, the short tail fibers bind the Glc-WTA  
6 polymers, fastening the baseplate to the cell surface. Consequently, the baseplate  
7 opens up, the sheath contracts and the internal tube is pushed through the baseplate,  
8 penetrating the host envelope to inject the phage genome (Kostyuchenko et al., 2005;  
9 Leiman and Shneider, 2012).

10 Perhaps the simplest strategy employed by bacteria to acquire phage resistance  
11 is modifying phage receptor. If a phage is unable to interact with the host cell,  
12 infection will be subsequently prevented (Samson et al., 2013; Yasbin et al., 1976).  
13 To overcome this defense strategy, the phage, in turn, can modify the receptor binding  
14 protein (Samson et al., 2013). By studying an accelerated evolutionary process  
15 between *B. subtilis* and its lytic phage SPO1, we detected the frequent emergence of  
16 mutant bacteria resistant to the phage. In turn, we could isolate mutant phages capable  
17 of infecting resistant bacterial strains lacking the SPO1 receptor. Remarkably, these  
18 mutant phages also gained the capacity to infect non-host *Bacillus* strains, thus  
19 shedding light on how phages in nature can acquire new hosts.

20

## 1 **Results**

### 2 **Isolation of *B. subtilis* mutants resistant to the SPO1 lytic phage**

3 To study the co-evolution of *B. subtilis* and its phages, we aimed at isolating bacteria  
4 that became resistant to the SPO1 lytic phage. Following infection of *mCherry* labeled  
5 *B. subtilis* cells [MH1, derived from PY79 parental strain (Youngman et al., 1984)], a  
6 substantial number of cells survived, as revealed by the subsequent colony formation  
7 analysis (Fig. S1A). All the isolated colonies produced mCherry and were capable of  
8 growing over agar plates containing the SPO1 phage. However, variations were  
9 observed in the degree of phage resistance, with some of the colonies exhibiting full  
10 resistance, while others displaying partial phenotypes (Fig. S1B). Further examination  
11 of two fully (M1-M2) and three partially (M3-M5) resistant mutants showed their  
12 phenotype to be consistent when infection was monitored in liquid medium (Fig. 1A).  
13 Whole genome sequence (WGS) analysis revealed that the fully resistant mutants M1  
14 and M2 contain mutations in *gtaC* and *gtaB*, respectively, whereas M3-M5 contain  
15 mutations in *tagE*, previously known as *gtaA* (Honeyman and Stewart, 1989) (Fig.  
16 1B). M4 and M5 strains harbored the exact same mutation, hence only M4 was further  
17 investigated. Reintroducing the M4 mutation into the wild type strain resulted in  
18 recapitulation of the partial resistant phenotype (Fig. S1C). A mutant disrupted for the  
19 *tagE* ( $\Delta tagE$ ) gene was fully resistant to SPO1 (Fig. 1A), indicating that the obtained  
20 *tagE* mutations enabled partial functionality of the protein. Consistently, the level of  
21 glycosylation within the obtained mutants correlated with their level of resistance, as  
22 indicated by staining with fluorescently labeled lectin Concanavalin A (ConA) that  
23 interacts specifically with the glucosyl residues of the major WTA (Doyle and  
24 Birdsell, 1972) (Fig. 1D). The identified mutated genes are all part of the major WTA  
25 glycosylation pathway: *GtaC* and *GtaB* are required for synthesizing the sugar residue

1 UDP-Glc that is then attached to the WTA polymers by TagE glycosyltransferase  
2 (Pooley et al., 1987; Sonenshein et al., 2002; Young, 1967) (Fig. 1C).

3 To extend our findings, four additional resistant strains (M6-M9) were  
4 subjected to sequence analysis of the *gtaB*, *gtaC* and *tagE* loci. M6 and M7 harbored  
5 deletions in *gtaB*, while the remaining strains (M8-M9) contained mutations in *tagE*,  
6 with M9 displaying a mutation identical to M4 and M5 (Fig. 1B). Thus, it seems that  
7 the most prevalent strategy for acquiring phage resistance is by excluding  
8 glycosylation of the cell surface major WTA polymers, which are utilized as a  
9 receptor by SPO1, as well as by other *B. subtilis* phages (Yasbin et al., 1976; Young,  
10 1967).

### 11 **SPO1 utilizes the minor WTA for cell surface attachment**

12 Since SPO1 receptor molecules were altered in the various resistant strains, we  
13 examined phage attachment to the surface of the partial and the fully resistant  
14 mutants. Phages were stained with the nucleic acid dye 4',6-diamidino-2-phenylindole  
15 (DAPI), incubated with the different bacterial strains, and binding was examined by  
16 fluorescence microscopy. As expected, SPO1 was deficient in attachment to  
17 M1(*gtaC*) and M2(*gtaB*) (Fig. S2A). Nevertheless, SPO1 could efficiently adsorb to  
18 M3(*tagE<sub>G387D</sub>*) and M4(*tagE<sub>Q613ns</sub>*) *tagE* mutant strains, and even to MH11(*ΔtagE*)  
19 that lacks TagE (Fig. S2A). Similar results were obtained with classical attachment  
20 assay detecting free unadsorbed phages (Ellis and Delbruck, 1939) (Fig. S2B). Thus,  
21 SPO1 can attach to *B. subtilis* mutants lacking its known receptor, without causing  
22 their lysis (Fig. 1A), suggesting that an additional SPO1 binding component exists. To  
23 examine this possibility, we tested the capacity of SPO1 to bind and lyse mutants in  
24 the additional TA elements, LTA (*ΔugtP*) and minor WTA (*ΔggaAB*) (Jorasch et al.,  
25 1998; Lazarevic et al., 2005) (Fig. 1C). No effect was observed with the *ugtP* mutant,

1 whereas a mutation in *ggaAB* largely reduced SPO1 binding (48%) (Fig. S2C).  
2 Accordingly, cell lysis kinetics of *ggaAB* mutant was slower and efficiency of plating  
3 (EOP) reduced (Fig. S2E and S2G). These results show that SPO1 attachment to the  
4 *QtagE* mutant is due to binding to the minor WTA. Although this attachment does not  
5 lead to a productive infection, it seems to facilitate SPO1 adsorption to the major  
6 form. Thus, similar to other phages, such as SPP1, K20 and T5 (Baptista et al., 2008;  
7 Heller and Braun, 1979; Silverman and Benson, 1987), SPO1 may have two modes of  
8 binding to the host, a reversible and an irreversible one.

### 9 **Isolation of phage mutants able to infect resistant bacteria**

10 We next aimed to isolate phages that can infect cells fully resistant to SPO1. Streaking  
11 M2(*gtaB*) resistant strain on a plate containing SPO1 resulted in the formation of two  
12 plaques in two independent events. Phages were isolated from the plaques and their  
13 sequence was determined by WGS. The plaques yielded two different SPO1 phages  
14 (SPO1-m1 and SPO1-m2), carrying different missense mutations in the same genes:  
15 *gp16.2* and *gp18.1* (Fig. 2A), indicating that the combination of both is necessary for  
16 infecting resistant bacteria. The product of *gp16.2* has similarity to a baseplate protein  
17 of the T4 phage, whereas *gp18.1* encodes a protein with similarity to Phi29 host  
18 recognition tail appendages, corresponding to SPO1 tail fibers (Habann et al., 2014;  
19 Stewart et al., 2009) (Fig. 2B). Thus, both phages contain mutations within the same  
20 genes, encoding phage structural elements that are most likely involved in host cell  
21 recognition.

22 We next wished to characterize the infection capability of the mutant phages.  
23 SPO1-m1 and SPO1-m2 were used to infect the WT and the  $\Delta$ *gtaB* strains (a  
24 complete deletion of *gtaB* was utilized in all following experiments). Both mutant  
25 phages were able to form plaques on WT cells, though plaque size was significantly

1 smaller than those formed by SPO1-wt (Fig. 2C). Further, both mutant phages could  
2 form plaques on  $\Delta gtaB$ , yet the number of plaques was reduced in comparison to  
3 plaques formed on a WT lawn (Fig. 2C). SPO1-m2 formed a higher number of  
4 plaques on  $\Delta gtaB$  than SPO1-m1 (Fig. 2C), and therefore was solely utilized for  
5 further characterization.

6 To further demonstrate that SPO1-m2 can inject its DNA and propagate in  
7 cells lacking *gtaB*, we infected the cells with SPO1-m2 in liquid medium and could  
8 detect lysis of the population (Fig. 2D). Infecting additional TA mutants with SPO1-  
9 m2 revealed improved EOP on  $\Delta ggaAB$  cells (Fig. S2G), as well as a new capability  
10 to infect  $\Omega tagE$  (compare Fig. S2E and Fig. S2F). To directly visualize SPO1-m2  
11 entry into  $\Delta gtaB$  cells, we constructed a strain harboring a reporter for SPO1  
12 infection. SPO1 gene *gp6.1*, which encodes the phage capsid protein (Stewart et al.,  
13 2009), was fused to *gfp* (ET8) and introduced into the *B. subtilis* genome. Upon  
14 infection, GP6.1-GFP protein switches its localization from a diffused to a foci-like  
15 pattern, reporting phage invasion (Fig. 2E). Time lapse microscopy of  $\Delta gtaB$   
16 harboring the GP6.1-GFP reporter showed no appearance of foci upon infection with  
17 SPO1-wt. On the other hand, SPO1-m2 foci were clearly observed (Fig. 2F). These  
18 results substantiate the view that SPO1 mutant phages are able to infect  $\Delta gtaB$  mutant  
19 cells.

## 20 **SPO1-m2 binding to resistant cells can be improved by experimental evolution**

21 To gain insight into the strategy exploited by SPO1-m2 to infect  $\Delta gtaB$  mutant, we  
22 investigated phage attachment to  $\Delta gtaB$  cells, as well as to additional mutants in the  
23 TA pathway. The analysis indicated only a slightly improved binding of SPO1-m2 to  
24  $\Delta gtaB$  (compare Fig. S2C and Fig. S2D). The binding of SPO1-m2 to mutants in the  
25 additional TA pathways was similar to that of SPO1-wt (compare Fig. S2C and Fig.



1 S2D). To better understand the infection strategy gained by the SPO1-m2 mutant  
2 phage, we attempted to improve its infectivity toward  $\Delta gtaB$  cells by experimental  
3 evolution. Indeed, following 6 cycles of evolution, in which the phage was incubated  
4 with  $\Delta gtaB$  host cells, a significant increase in SPO1-m2 adsorption and infectivity  
5 was observed (Fig. 3A-3B). WGS of SPO1-m2\* isolate revealed the existence of two  
6 additional new mutations in *gp18.1* gene, and a missense mutation in *gp18.3* gene,  
7 encoding a putative tail base plate protein, in comparison to SPO1-m2 genome (Fig.  
8 3C). Overall, our results suggest that the mutant phages acquired the capability to bind  
9 a surface component that cannot be recognized by SPO1-wt phage.

#### 10 ***tagO* mutant cells are resistant to SPO1-m2**

11 Interestingly, we could not detect the emergence of WT or  $\Delta gtaB$  mutants resistant to  
12 SPO1-m2, neither from liquid culture nor from spotting high levels of phages on a  
13 lawn of cells (Fig. 4A-4B). We next searched for mutant bacteria, resistant to SPO1-  
14 m2 by transposon mutagenesis. Approximately 11,500 transposon mutated colonies of  
15 the  $\Delta gtaB$  strain were streaked over plates containing SPO1-m2. The only two  
16 bacterial mutant colonies grown on the phage containing plates were mutated in the  
17 *znuC* gene, encoding a high affinity ABC zinc transporter, which imports zinc into the  
18 cell under conditions of zinc deprivation (Gaballa and Helmann, 1998). However, our  
19 analysis revealed that ZnuC does not function as a binding molecule for SPO1, and  
20 supplementation of excess Zinc suppressed the resistant phenotype (Fig. S3). Further,  
21 time lapse microscopy indicated that ZnuC acts to provide zinc to facilitate later  
22 stages of infection of both SPO1-wt and SPO1-m2 phages (Fig. S3E). Conducting  
23 additional genetic screens using chemical mutagenesis in an attempt to identify SPO1-  
24 m2 resistant mutants failed, and only mutants in *znuC* were repetitively isolated. This  
25 observation indicates that acquisition of such resistance is a rare event.

1           Next, we combined several mutations in the TA assembly pathway in an  
2 attempt to decipher the SPO1-m2 binding molecule. Some reduction in SPO1-m2  
3 infectivity was monitored, though it could not be eliminated (Fig. S4A-S4C).  
4 Nevertheless, deletion of the *tagO* gene, catalyzing the attachment of N-  
5 acetylglucosamine to undecaprenyl pyrophosphate, i.e the first step of the TA linkage  
6 unit synthesis (Brown *et al.*, 2013), conferred full resistance to SPO1-m2, as well as  
7 to SPO1-wt and SPO1-m2\* (Fig. 4C-4E). Cells lacking *tagO* exhibit severe growth  
8 and morphology defects (Fig. S4D) (D'Elia *et al.*, 2006), this could be the reason that  
9 mutants in *tagO* were not obtained following transposon mutagenesis. Nevertheless,  
10 *tagO* mutant cells were susceptible to SPP1 phage that utilizes a membrane protein  
11 (YueB) as the final receptor (Sao-Jose *et al.*, 2004) (Fig. 4C-4E), signifying that the  
12 resistance to SPO1 is specifically due to the lack of TA.

13           In the absence of *tagO*, cells are lacking both the TA polymers and the linkage  
14 unit connecting them to the cell wall, placing each of these two components as a  
15 potential receptor for SPO1-m2. Since mutations in the assembly of TA polymers are  
16 lethal (Bhavsar *et al.*, 2004; D'Elia *et al.*, 2006), we sought to differentiate between  
17 these two possibilities by employing *B. subtilis* W23 strain, which utilizes the same  
18 TA linkage unit as PY79, but harbors TA polymers composed of a backbone of ribitol  
19 subunits poly(Rbo-P) instead of glycerol poly(Gro-P) (Anderson *et al.*, 1977). W23 is  
20 sensitive to SPO1-wt, yet EOP is reduced in comparison to PY79 (Yasbin *et al.*, 1976)  
21 (Fig. 4F-4G). Nevertheless, W23 was almost fully resistant to SPO1-m2 and SPO1-  
22 m2\* (Fig. 4F-4G), indicating that TA polymers, rather than the common linkage unit,  
23 serve as a receptor for the mutant bacteriophages.

24   **SPO1 mutant phage gained a broader host range**

1 While the glycosylation pattern of TA polymers largely varied among Gram positive  
2 bacteria, the TA polymer backbone is uniform among diverse species (Anderson et  
3 al., 1977; Illing, 2002). Therefore, we hypothesized that if SPO1-m2 interacts directly  
4 with the TA polymer backbone, it might exhibit a broader host range, capable of  
5 infecting non-host species, harboring poly(Gro-P)-based TA polymers (Brown *et al.*,  
6 2013, Illing *et al.*, 2002). To test this possibility, an array of *Bacillus* species were  
7 infected with SPO1-wt and SPO1-m2, and cell lysis was monitored (Fig. S5).  
8 Remarkably, indeed SPO1-m2 gained the capacity to lyse both *B. amyloliquefaciens*  
9 (*B. amylo*) and *B. pumilus*, close relatives of *B. subtilis*, which were not infected by  
10 SPO1-wt (Fig. 5A-5B and Fig. S5). Furthermore, a closer investigation of the *B.*  
11 *amylo* and *B. pumilus* interaction with SPO1-wt and SPO1-m2 by time lapse  
12 microscopy indicated the frequent lysis of both strains by SPO1-m2 but not by SPO1-  
13 wt (Fig. 5C and Fig. S6A), thus directly demonstrating the ability of the mutant phage  
14 to infect the new hosts.

15 Comparing ConA staining of the newly invaded strains with that of *B. subtilis*  
16 (PY79) revealed a distinct pattern for *B. amylo* and the complete lack of signal from  
17 *B. pumilus* (Fig. 5D), signifying that both contain Glc-TA patterns different than that  
18 of *B. subtilis*. Monitoring phage binding to the new hosts by fluorescence microscopy  
19 and classical attachment assays denoted a slight increase in the attachment of SPO1-  
20 m2 in comparison to SPO1-wt that was significantly elevated by SPO1-m2\* (Fig. 5E  
21 and Fig. S6B-S6C).

22 Taken together, our results show that the mutant phage gained the ability to  
23 infect resistant *B. subtilis* cells, and concomitantly acquired the advantage of invading  
24 new hosts.

25

## 1 **Discussion**

2 The arms race between phages and their surrounding bacteria shapes the structure of  
3 bacterial communities in nature [e.g. (Samson et al., 2013; Suttle, 2007)].  
4 Bacteriophages are typically specific to a single host species (Flores et al., 2011;  
5 Koskella and Meaden, 2013), and relatively little is known about their ability to  
6 acquire new hosts. Here we show that upon infection with a lytic phage, resistant  
7 bacterial mutants rapidly arose. In turn, mutant phages capable of infecting resistant  
8 bacteria evolved, and concomitantly gained the flexibility needed to cross the species  
9 barrier. The emergence of such adapted phages can provide a new conceptual  
10 understanding as of how phages in nature invade new hosts, and how the phage-host  
11 battle is accelerated.

12       Some phages of *Escherichia coli* (*E. coli*) were shown to gain the ability to  
13 infect resistant bacteria by acquiring mutations enabling the recognition of an  
14 alternative outer membrane receptor, homologous to the original one [e.g.(Drexler et  
15 al., 1989; Hashemolhosseini et al., 1994; Meyer et al., 2012)]. For example, mutations  
16 within the phage Ox2 allowed the recognition of the outer membrane protein OmpC,  
17 as an alternative to the original binding receptor OmpA (Drexler et al., 1989). Further,  
18 mutant phages that could recognize LPS molecules subsequently arose (Drexler et al.,  
19 1991). Here we characterized a SPO1 mutant phage that acquired the capability to  
20 infect bacteria resistant to the wild type phage, lacking its Glc-TA receptor. Based on  
21 our data, we propose that this mutant phage utilizes the TA polymer backbone as a  
22 receptor, bypassing the need for binding the glucosyl residues decorating these  
23 polymer chains. The capacity to recognize the TA polymers *per se*, which is less  
24 diverse than the glucosylation patterns (Illing *et al*, 2002, Lazarevic *et al.*, 2005),

1 enables the mutant phage to bind and infect bacterial species harboring dissimilar  
2 glucosylation patterns, but sharing a similar TA polymer backbone (Fig. 6).

3 In this study, we could easily isolate bacteria resistant to SPO1, with altered  
4 TA molecules. Since the majority of known *B. subtilis* phages utilize Glc-TA as a  
5 receptor for attachment and/or invasion into the host (Yasbin et al., 1976; Young,  
6 1967), the emergence of "super resistant" bacteria seems an easy task. However, the  
7 preservation of Glc-TA in nature emphasizes the necessity of these surface molecules  
8 for bacterial physiology. TAs have been implicated in various cellular processes, such  
9 as structuring cell shape, cell division, colony formation and ion homeostasis (Brown  
10 et al., 2013; Mamou et al., 2017; Schneewind and Missiakas, 2014), yet the role of  
11 glycosylation of TAs is much less understood.

12 It has been recently shown that phage can broaden its host range to infect  
13 different bacterial species by evolving on an intermediate suboptimal host. This  
14 suboptimal host enables gradual adaptation toward a new host species. Such evolution  
15 was shown to occur in a multispecies bacterial community, like the gut microbiome,  
16 but could not be detected in a community composed of a pure species (De Sordi et al.,  
17 2017). Here we demonstrate that during co-evolution of a phage with its optimal-host  
18 species, an intermediate host evolved, which is resistance to the original phage, hence  
19 facilitating phage evolution toward the infection of new species.

20 We have previously provided evidence that phages can infect resistant bacteria  
21 that received the receptor from their sensitive neighboring cells (Tzipilevich et al.,  
22 2017). In this research, we describe a strategy by which phages gain mutations,  
23 enabling the infection of resistant bacteria in the absence of the phage natural  
24 receptor. As we showed, isolation of bacteria resistant to this mutated phage appears a

1 difficult task, as *tagO* mutation causes severe growth defects, and defects in the  
2 synthesis of TA polymers has been shown to be lethal to the cells (Bhavsar et al.,  
3 2004; D'Elia et al., 2006). This observation raises the possibility that employing  
4 resistant bacteria to select for mutant phages can provide a promising strategy for a  
5 successful phage therapy.

6

## 1 **Experimental Procedures**

### 2 **Strains and plasmids**

3 All bacterial strains and phages utilized in this study are listed in Tables S1 and S2.  
4 Plasmid constructions were performed in *E. coli* (DH5 $\alpha$ ) using standard methods  
5 (Green et al., 2012) and are listed in Table S3. All primers used in this study are listed  
6 in Table S4.

### 7 **General growth conditions**

8 Bacterial cultures were inoculated at 0.05 OD<sub>600</sub> from an overnight culture grown at  
9 23°C, and growth was carried out at 37°C in LB medium supplemented with 5 mM  
10 MgCl<sub>2</sub> and 0.5 mM MnCl<sub>2</sub> (MMB). Additional standard methods were carried out as  
11 previously described (Harwood and Cutting, 1990). For induction of the P<sub>xyI</sub>, xylose  
12 concentration was 0.25%.

### 13 **Phage lysate preparation**

14 Phage lysate was prepared by adding approximately 10<sup>9</sup> phages to 10 ml mid-log cells  
15 grown in MMB at 37°C, until the culture was completely cleared. Next, the lysate was  
16 filtered through a 0.22  $\mu$ m Millipore filter. The number of phages was determined by  
17 PFU/ml. SPO1-m1 or SPO-m2 lysate was prepared from plaques with exponentially  
18 growing ET30 cells. The plate was incubated overnight at 37°C. Next, 7 ml of MMB  
19 was poured over the plate, incubated for an hour, and the liquid was collected and  
20 filtered through a 0.22  $\mu$ m Millipore filter.

### 21 **Phage infection analysis**

1 For liquid phage infection assays, the appropriate phage lysate (approximately  $10^9$ -  
2  $10^{10}$  PFU/ml) was added to a mid-log (0.4-0.5 OD<sub>600</sub>) culture in 1:10 volume ratio  
3 (lysate: culture). Cells were grown in MMB at 37°C, and OD<sub>600</sub> was measured every  
4 30 min using spectrophotometer or microplate reader (Spark 10M, Tecan). Plaques  
5 formation analysis was carried out by adding 100 µl of phage lysate (approximately  
6  $10^3$ - $10^4$  PFU/ml), and 100 µl of bacterial culture (0.7 OD<sub>600</sub>) into 3 ml warm MMB  
7 containing 0.8% agar. The mixture was spread over MMB agar plate, incubated  
8 overnight at 37°C, and PFU/ml was determined. For preparation of phage containing  
9 plates, phage lysate (5 ml, approximately  $10^{10}$  PFU/ml) was added to warm 250 ml  
10 MMB containing 1.6% agar, and the medium was poured into plates.

#### 11 **Phage attachment assay**

12 Indicated bacterial strains were grown in a liquid culture to OD<sub>600</sub> 0.6, and phage  
13 adsorption to the cells was measured at 12 min post infection, by titrating the free  
14 phages present in the supernatant as previously described (Baptista et al., 2008). In  
15 brief, logarithmic cells were grown in MMB at 37 °C till 0.8 OD<sub>600</sub>, then 15 mM CaCl<sub>2</sub>  
16 and 50 µg chloramphenicol/ml were added to the medium and cells were incubated  
17 for 10 min. Next, cells were infected with phages ( $10^7$  PFU/ml), and samples (0.5 ml)  
18 were collected at 12 min post infection, centrifuged for 1 min, and 50 µl of the  
19 supernatant was diluted, plated, and PFU/ml was determined.

#### 20 **SPO1-m2\* phage evolution**

21 SPO1-m2 phage lysate (approximately  $10^9$  PFU/ml) was added to a mid-log (0.5  
22 OD<sub>600</sub>) culture of ET30 ( $\Delta$ *gtaB*) in 1:10 (lysate: culture) volume ratio. Cultures were  
23 incubated overnight to ensure complete lysis. In the next day, the lysed culture was



1 used to infect a fresh culture of ET30 ( $\Delta gtaB$ ). We estimate that each cycle included  
2 approximately 4 phage replication cycles.

### 3 **Phage spotting assay**

4 Bacterial strains were grown in liquid culture to OD<sub>600</sub> 0.8, 200  $\mu$ l of cell were spread  
5 on LB plates in triplicates. The indicated phages ( $10^8$  PFU/ml, 10  $\mu$ l) were spotted  
6 twice on each plate, and plates were incubated overnight at 37 °C

### 7 **Phage DNA labeling and microscope absorption assay**

8 For DNA labeling, 100  $\mu$ l of phage lysate (approximately  $10^9$ - $10^{10}$  PFU/ml) were  
9 mixed with 2  $\mu$ g/ml 4,6-Diamidino-2-phenylindole (DAPI) (Sigma) for 2 min.  
10 Labeled phages were dialyzed to remove excess dye using Slide-A-Lyzer MINI  
11 Dialysis Devices (Pierce Biotechnology). Lysate was placed in the dialysis tube and  
12 gently rolled inside 50 ml tube filled with MMB medium to remove the excess dye.  
13 Tubes were incubated over night (rolling shaker) in the dark at room temperature. For  
14 phage microscopic adsorption assay, 500  $\mu$ l of mid-log growing cells were mixed with  
15 15  $\mu$ l labeled phages, incubated at room temperature for 10 min, and centrifuged for 2  
16 min (8000 RPM) to pellet the cells. Supernatant was removed, and cells were  
17 suspended in the residual medium for further microscope analysis.

### 18 **Fluorescence microscopy**

19 For fluorescence microscopy, bacterial cells (0.5 ml, OD<sub>600</sub> 0.5) were centrifuged and  
20 suspended in 50  $\mu$ l of MMB. For real time infection experiments, 1 ml logarithmic  
21 cells grown in MMB were infected with phages (100  $\mu$ l of approximately  $10^{10}$   
22 PFU/ml). Culture was incubated at 37°C for 10 min, the infected cells were placed  
23 over 1% agarose pad and incubated in a temperature controlled chamber (Pecon-

1 Zeiss) at 37°C. Samples were photographed using Axio Observer Z1 (Zeiss),  
2 equipped with CoolSnap HQII camera (Photometrics, Roper Scientific). System  
3 control and image processing were performed using MetaMorph 7.4 software  
4 (Molecular Devices).

## 5 **ConA labeling**

6 Logarithmic cells grown in LB were suspended in 1 ml PBSx1 and washed once.  
7 Concanavalin A (ConA)-conjugated Alexa-Fluor 488 (ConA-AF488; Invitrogen) was  
8 dissolved in 0.1 M sodium bicarbonate (pH 8.3) to 5 mg/ml stock solution. ConA-  
9 AF488 was added to the cell suspension (200 µg/ml), and the mixture was incubated  
10 in the dark at room temperature for 30 min. Cells were washed 3 times, resuspended  
11 in PBSx1, and subjected to microscopy analysis.

## 12 **Isolation of phage resistant mutants**

13 For spontaneous isolation of phage resistant mutants, 1 ml of mid-log (0.4-0.5 OD<sub>600</sub>)  
14 *B. subtilis* culture grown in MMB medium was infected with 100 µl of phage lysate  
15 (approximately 10<sup>9</sup>-10<sup>10</sup> PFU/ml). Next, the infected culture was incubated at 37°C  
16 until clearance, and the lysate was spread over MMB plates without dilution. Plates  
17 were grown overnight at 37°C, and colonies were streaked over plates containing  
18 SPO1-wt. For isolation of phage resistant mutants, transposon mutagenesis of *B.*  
19 *subtilis* cells (MH30) was carried out as previously described (Pozsgai et al., 2012).  
20 Mutated colonies were grown on chloramphenicol containing plates, picked and  
21 streaked over plates containing SPO1-m2, and phage resistant colonies were isolated.  
22 Phage containing plates contained SPO1 lysate (5 ml, approximately 10<sup>10</sup> PFU/ml)  
23 added to warm 250 ml MMB containing 1.6% agar.

## 1 **WGS analysis**

2 Genomic DNA was extracted from mutant and parental strains using wizard genomic  
3 DNA purification kit (Promega). Libraries were prepared using Nextra XT kit  
4 (Illumina), and sequenced in a MiSeq sequencer (Illumina). The sequencing was pair  
5 end of 250bp X2. Quality assessment was carried out with the software FastQC  
6 (version 0.10.1). Sequence reads were aligned using NCBI *B. subtilis* PY79 genome  
7 (GenBank: CP004405.1). The sequence of the mutants was aligned with that of the  
8 parental strain. For phage genomic analysis, DNA was extracted using Phage DNA  
9 isolation Kit (Norgen biotek). Sequence reads of SPO1-wt were aligned using NCBI  
10 SPO1 phage genome (GenBank: Bacillus phage SPO1.NC\_011421.1), and the mutant  
11 phages were aligned with the wild type phage.

12

1 **Acknowledgments:** We thank David Rudner (Harvard University, USA), Dan Kearns  
2 (Indiana University, USA), Rotem Sorek (Weizman institute Israel), Eric Brown  
3 (McMaster University, Canada) and Carlos São-José (Lisbon University, Portugal) for  
4 providing *B. subtilis* strains. We are grateful to Alex Rouvinski (Hebrew University,  
5 Israel) and members of the Ben-Yehuda laboratory for valuable comments.

6

7 **Author contributions:** MH and ET have carried out the described experiments. MH,  
8 ET and SBY contributed to the conception and design of the study, interpretation of  
9 the data, and writing of the manuscript.

10

## 1   **References**

- 2   Anderson, A.J., Green, R.S., and Archibald, A.R. (1977). Specific determination of  
3   ribitol teichoic acid in whole bacteria and isolated walls of *Bacillus subtilis* W23.  
4   Carbohydrate research 57, C7-10.
- 5   Baptista, C., Santos, M.A., and Sao-Jose, C. (2008). Phage SPP1 reversible adsorption  
6   to *Bacillus subtilis* cell wall teichoic acids accelerates virus recognition of membrane  
7   receptor YueB. Journal of bacteriology 190, 4989-4996.
- 8   Bhavsar, A.P., Erdman, L.K., Schertzer, J.W., and Brown, E.D. (2004). Teichoic acid  
9   is an essential polymer in *Bacillus subtilis* that is functionally distinct from  
10   teichuronic acid. Journal of bacteriology 186, 7865-7873.
- 11   Brown, S., Santa Maria, J.P., Jr., and Walker, S. (2013). Wall teichoic acids of gram-  
12   positive bacteria. Annu Rev Microbiol 67, 313-336.
- 13   D'Elia, M.A., Millar, K.E., Beveridge, T.J., and Brown, E.D. (2006). Wall teichoic  
14   acid polymers are dispensable for cell viability in *Bacillus subtilis*. Journal of  
15   bacteriology 188, 8313-8316.
- 16   De Sordi, L., Khanna, V., and Debarbieux, L. (2017). The gut microbiota facilitates  
17   drifts in the genetic diversity and infectivity of bacterial viruses. Cell host & microbe  
18   22, 801-808 e803.
- 19   Doyle, R.J., and Birdsell, D.C. (1972). Interaction of concanavalin A with the cell  
20   wall of *Bacillus subtilis*. Journal of bacteriology 109, 652-658.
- 21   Drexler, K., Dannull, J., Hindennach, I., Mutschler, B., and Henning, U. (1991).  
22   Single mutations in a gene for a tail fiber component of an *Escherichia coli* phage can  
23   cause an extension from a protein to a carbohydrate as a receptor. J Mol Biol 219,  
24   655-663.
- 25   Drexler, K., Riede, I., Montag, D., Eschbach, M.L., and Henning, U. (1989). Receptor  
26   specificity of the *Escherichia coli* T-even type phage Ox2. Mutational alterations in  
27   host range mutants. J Mol Biol 207, 797-803.
- 28   Ellis, E.L., and Delbruck, M. (1939). The growth of bacteriophage. J Gen Physiol 22,  
29   365-384.
- 30   Flores, C.O., Meyer, J.R., Valverde, S., Farr, L., and Weitz, J.S. (2011). Statistical  
31   structure of host-phage interactions. Proc Natl Acad Sci U S A 108, E288-297.
- 32   Fokine, A., and Rossmann, M.G. (2014). Molecular architecture of tailed double-  
33   stranded DNA phages. Bacteriophage 4, e28281.
- 34   Gaballa, A., and Helmann, J.D. (1998). Identification of a zinc-specific  
35   metalloregulatory protein, Zur, controlling zinc transport operons in *Bacillus subtilis*.  
36   Journal of bacteriology 180, 5815-5821.
- 37   Green, M.R., and Sambrook, J. (2012). Molecular cloning: a laboratory manual, 4th  
38   edn (Cold Spring Harbor, N.Y.: Cold Spring Harbor Laboratory Press).
- 39   Habann, M., Leiman, P.G., Vandersteegen, K., Van den Bossche, A., Lavigne, R.,  
40   Shneider, M.M., Biemann, R., Eugster, M.R., Loessner, M.J., and Klumpp, J. (2014).

- 1 Listeria phage A511, a model for the contractile tail machineries of SPO1-related  
2 bacteriophages. *Molecular microbiology* 92, 84-99.
- 3 Harwood, C.R., and Cutting, S.M. (1990). *Molecular biological methods for Bacillus*  
4 (Chichester ; New York: Wiley).
- 5 Hashemolhosseini, S., Holmes, Z., Mutschler, B., and Henning, U. (1994). Alterations  
6 of receptor specificities of coliphages of the T2 family. *J Mol Biol* 240, 105-110.
- 7 Heller, K., and Braun, V. (1979). Accelerated adsorption of bacteriophage T5 to  
8 *Escherichia coli* F, resulting from reversible tail fiber-lipopolysaccharide binding.  
9 *Journal of bacteriology* 139, 32-38.
- 10 Honeyman, A.L., and Stewart, G.C. (1989). The nucleotide sequence of the *rodC*  
11 operon of *Bacillus subtilis*. *Molecular microbiology* 3, 1257-1268.
- 12 Iling, N. (2002). *Bacillus subtilis* and its closest relatives: From genes to cells. *Nature*  
13 415, 263-264.
- 14 Jorasch, P., Wolter, F.P., Zahringer, U., and Heinz, E. (1998). A UDP  
15 glucosyltransferase from *Bacillus subtilis* successively transfers up to four glucose  
16 residues to 1,2-diacylglycerol: expression of *ypfP* in *Escherichia coli* and structural  
17 analysis of its reaction products. *Molecular microbiology* 29, 419-430.
- 18 Koskella, B., and Meaden, S. (2013). Understanding bacteriophage specificity in  
19 natural microbial communities. *Viruses* 5, 806-823.
- 20 Kostyuchenko, V.A., Chipman, P.R., Leiman, P.G., Arisaka, F., Mesyanzhinov, V.V.,  
21 and Rossmann, M.G. (2005). The tail structure of bacteriophage T4 and its  
22 mechanism of contraction. *Nat Struct Mol Biol* 12, 810-813.
- 23 Lazarevic, V., Pooley, H.M., Mauël, C., and Karamata, D. (2005). Teichoic and  
24 teichuronic acids from Gram-Positive bacteria. In *Biopolymers Online* (Wiley-VCH  
25 Verlag GmbH & Co. KGaA).
- 26 Leiman, P.G., and Shneider, M.M. (2012). Contractile tail machines of  
27 bacteriophages. *Adv Exp Med Biol* 726, 93-114.
- 28 Mamou, G., Fiyaksel, O., Sinai, L., and Ben-Yehuda, S. (2017). Deficiency in  
29 lipoteichoic acid synthesis causes a failure in executing the colony developmental  
30 program in *Bacillus subtilis*. *Frontiers in microbiology* 8, 1991.
- 31 Meyer, J.R., Dobias, D.T., Weitz, J.S., Barrick, J.E., Quick, R.T., and Lenski, R.E.  
32 (2012). Repeatability and contingency in the evolution of a key innovation in phage  
33 lambda. *Science* 335, 428-432.
- 34 Moldovan, R., Chapman-McQuiston, E., and Wu, X.L. (2007). On kinetics of phage  
35 adsorption. *Biophys J* 93, 303-315.
- 36 Parker, M.L., Ralston, E.J., and Eiserling, F.A. (1983). Bacteriophage SPO1 structure  
37 and morphogenesis. II. Head structure and DNA size. *J Virol* 46, 250-259.
- 38 Pooley, H.M., Paschoud, D., and Karamata, D. (1987). The *gtaB* marker in *Bacillus*  
39 *subtilis* 168 is associated with a deficiency in UDPglucose pyrophosphorylase.  
40 *Journal of general microbiology* 133, 3481-3493.

- 1 Pozsgai, E.R., Blair, K.M., and Kearns, D.B. (2012). Modified mariner transposons  
2 for random inducible-expression insertions and transcriptional reporter fusion  
3 insertions in *Bacillus subtilis*. *Appl Environ Microbiol* 78, 778-785.
- 4 Rakhuba, D.V., Kolomiets, E.I., Dey, E.S., and Novik, G.I. (2010). Bacteriophage  
5 receptors, mechanisms of phage adsorption and penetration into host cell. *Polish*  
6 *journal of microbiology / Polskie Towarzystwo Mikrobiologow = The Polish Society*  
7 *of Microbiologists* 59, 145-155.
- 8 Samson, J.E., Magadan, A.H., Sabri, M., and Moineau, S. (2013). Revenge of the  
9 phages: defeating bacterial defences. *Nat Rev Microbiol* 11, 675-687.
- 10 Sao-Jose, C., Baptista, C., and Santos, M.A. (2004). *Bacillus subtilis* operon encoding  
11 a membrane receptor for bacteriophage SPP1. *Journal of bacteriology* 186, 8337-  
12 8346.
- 13 Schneewind, O., and Missiakas, D. (2014). Lipoteichoic acids, phosphate-containing  
14 polymers in the envelope of gram-positive bacteria. *Journal of bacteriology* 196,  
15 1133-1142.
- 16 Silverman, J.A., and Benson, S.A. (1987). Bacteriophage K20 requires both the OmpF  
17 porin and lipopolysaccharide for receptor function. *Journal of bacteriology* 169, 4830-  
18 4833.
- 19 Sonenshein, A.L., Hoch, J.A., and Losick, R. (2002). *Bacillus Subtilis* and Its Closest  
20 Relatives (ASM Press).
- 21 Stewart, C.R., Casjens, S.R., Cresawn, S.G., Houtz, J.M., Smith, A.L., Ford, M.E.,  
22 Peebles, C.L., Hatfull, G.F., Hendrix, R.W., Huang, W.M., *et al.* (2009). The genome  
23 of *Bacillus subtilis* bacteriophage SPO1. *J Mol Biol* 388, 48-70.
- 24 Suttle, C.A. (2007). Marine viruses-major players in the global ecosystem. *Nat Rev*  
25 *Microbiol* 5, 801-812.
- 26 Tzipilevich, E., Habusha, M., and Ben-Yehuda, S. (2017). Acquisition of Phage  
27 Sensitivity by Bacteria through Exchange of Phage Receptors. *Cell* 168, 186-199  
28 e112.
- 29 Yasbin, R.E., Maino, V.C., and Young, F.E. (1976). Bacteriophage resistance in  
30 *Bacillus subtilis* 168, W23, and interstrain transformants. *Journal of bacteriology* 125,  
31 1120-1126.
- 32 Young, F.E. (1967). Requirement of glucosylated teichoic acid for adsorption of  
33 phage in *Bacillus subtilis* 168. *Proc Natl Acad Sci U S A* 58, 2377-2384.
- 34 Youngman, P., Perkins, J.B., and Losick, R. (1984). A novel method for the rapid  
35 cloning in *Escherichia coli* of *Bacillus subtilis* chromosomal DNA adjacent to Tn917  
36 insertions. *Molecular & general genetics : MGG* 195, 424-433.
- 37

## 1 **Figure Legends**

### 2 **Figure 1. Phenotypes of phage resistance displayed by the isolated bacterial** 3 **mutants**

4 (A) Lysis assay of WT (MH1) and the indicated mutant strains infected with SPO1  
5 (MOI=10) (t=0). Cell lysis was followed by OD<sub>600</sub> at the indicated time points. M4  
6 and M5 infection kinetic exhibits only slight delay in liquid medium. Shown are  
7 average values and SD of at least 3 independent experiments.

8 (B) Phage resistant mutants M1-M5 were characterized by WGS, whereas M6-M9  
9 mutants (highlighted in grey) were characterized by sequence analysis of *gtaB*, *gtaC*  
10 and *tagE* loci. The indentified mutations in each strain are listed. Alleles are indicated  
11 by amino acid positions.

12 (C) Diagram showing the flow of UDP-glucose (UDP-Glc) in the production of the  
13 three TA pathways and the key enzymes involved in their synthesis in *B. subtilis*.  
14 Adapted from (Schneewind and Missiakas, 2014).

15 (D) ConA-AF488 labeling of Glc-WTA of the indicated bacterial strains. Shown are  
16 phase-contrast (upper panels) and the corresponding fluorescent ConA-AF488 (lower  
17 panels) images. Scale bar, 4  $\mu$ m.

18

### 19 **Figure 2. Isolation of SPO1 mutant phages that can infect resistant host cells**

20 (A) SPO1 mutant phages that could infect  $\Delta$ *gtaB* (ET30) mutant cells were subjected  
21 to WGS. Mutation positions are listed.

22 (B) Schematic representation of the general structural components of SPO1 phage.  
23 The phage tail consists of a contractile sheath, an interior tail tube through which the  
24 DNA is injected, and a baseplate. The baseplate carries the tail fibers, which serves as  
25 the phage host recognition receptor.



1 (C) SPO1-wt, SPO1-m1 and SPO1-m2 phages were utilized to infect lawns of WT  
2 (PY79) and  $\Delta gtaB$  (ET30) strains, and infection efficiency was detected by plaque  
3 formation using an agar overlay assay. The same concentration of phages was used  
4 for infection of both cell lawns ( $\sim 10^4$  PFU/ml). Shown are representative plaque  
5 images and the average plaque diameter calculated from at least 30 plaques from 3  
6 different independent experiments. Only unambiguous plaques from each experiment  
7 were considered for the analysis. Scale bar, 8 mm.

8 (D)  $\Delta gtaB$  (ET30) cells were infected with either SPO1-wt or SPO1-m2 (MOI=10)  
9 ( $t=0$ ) and cell lysis was followed by OD<sub>600</sub> at the indicated time points. Shown are  
10 average values and SD of at least 3 independent experiments.

11 (E) Cells (ET8) harboring  $P_{xyI}-gfp-gp6.1$  were grown in the presence of xylose  
12 (0.25%) and infected with SPO1-wt or SPO1-m2 (MOI=10). Shown are fluorescence  
13 images from GFP-GP6.1 expressing cells, uninfected (upper panel), or 1 hr post  
14 infection with SPO1-wt (mid panel) or SPO1-m2 (lower panel). Scale bar, 4  $\mu$ m.

15 (F) Cells (MH34) harboring  $\Delta gtaB$  and carrying  $P_{xyI}-gfp-gp6.1$  were grown in the  
16 presence of xylose (0.25%), infected with SPO1-wt or SPO1-m2 (MOI=10) ( $t=0$ ), and  
17 followed by time lapse microscopy. Shown are fluorescence images from GFP-GP6.1  
18 at  $t=1$  hr (1, 1'),  $t=1.5$  hrs (2, 2') and a magnification of the framed regions in 2 and 2'  
19 (3, 3'). Arrows highlight the formation of GFP-GP6.1 foci. Scale bar, 4  $\mu$ m.

20

21 **Figure 3. Evolution of SPO1-m2 yielded phages with increased infectivity of**  
22  **$\Delta gtaB$  cells**

23 (A) Three independent SPO1-m2 lysates were evolved on  $\Delta gtaB$  (ET30) cells for 6  
24 cycles, 1-7, whereby 1 is the starting population. EOF (efficiency of plating) on  $\Delta gtaB$   
25 (ET30) [number of plaques on ET30/ number of plaques on WT (PYT9)] was

1 monitored for each cycle. The lysate with the best EOF (red line), termed SPO1-m2\*,  
2 was used for further characterization. Shown are average values and SD of at least 3  
3 independent experiments.

4 **(B)**  $\Delta gtaB$  (ET30) cells were infected with SPO1-m2 from the indicated cycles of  
5 evolution in (H, red line) (MOI=0.1). Phage adsorption was monitored after 12 min by  
6 PFU/ml. Percentage phage adsorption was calculated as follows:  $(P_0 - P_1) \times 100 / P_0$ ,  
7 where  $P_0$  is the initial phage input in the lysate (PFU/ml), and  $P_1$  is the titer of free  
8 phages (PFU/ml) after cell infection. Shown are average values and SD of at least 3  
9 independent experiments.

10 **(C)** SPO1-m2\* phage was subjected to WGS. The identified additional mutation  
11 positions are listed.

12

#### 13 **Figure 4. *tagO* mutant cells are resistant to SPO1-m2 phage**

14 **(A)** SPO1-wt and SPO1-m2 phages ( $10^8$  PFU) were spotted on lawns of *B. subtilis*  
15 (*B.s*) (PY79) or  $\Delta gtaB$  (ET30) cells, and cell lysis was monitored after overnight.  
16 Spontaneous resistant colonies are seen within SPO1-wt lysis zone but not within  
17 SPO1-m2. Shown are representative images of at least 3 independent experiments.

18 **(B)** WT (PY79) and  $\Delta gtaB$  (ET30) cells were infected with either SPO1-wt or SPO1-  
19 m2 (MOI=10) ( $t=0$ ), and  $OD_{600}$  was detected after 20 hrs of infection. Spontaneously  
20 arose resistant cells are capable of growing in the presence of the SPO1-wt phage.  
21 Shown are average values and SD of at least 3 independent experiments.

22 **(C)** The indicated phages were spotted on lawns of  $\Delta tagO$  (MH36) cells ( $10^8$  PFU).  
23 Cell lysis was monitored after overnight. Shown are representative images of at least  
24 3 independent experiments.

1 (D) Lysis assay of WT (PY79)  $\Delta gtaB$  (ET30) and  $\Delta tagO$  (MH36) strains infected with  
2 SPO1-m2 (MOI=10) ( $t=0$ ). Cell lysis was followed by  $OD_{600}$  at the indicated time  
3 points.  $\Delta tagO$  (MH36) strain, infected with SPP1 was followed for comparison.  
4 Shown are average values and SD of at least 3 independent experiments.

5 (E)  $\Delta tagO$  (MH36) cells were infected with the indicated phages, and phage  
6 (MOI=0.1) adsorption was monitored after 12 min by PFU/ml. Percentage phage  
7 adsorption was calculated as follows:  $(P_0 - P_1) \times 100 / P_0$ , where  $P_0$  is the initial phage  
8 input in the lysate (PFU/ml), and  $P_1$  is the titer of free phages (PFU/ml) after cell  
9 infection. Shown are average values and SD of at least 3 independent experiments.

10 (F) *B. subtilis* W23 cells were infected with the indicated phages (MOI=0.1), and  
11 phage adsorption was monitored after 12 min by PFU/ml. Percentage phage  
12 adsorption was calculated as follows:  $(P_0 - P_1) \times 100 / P_0$ , where  $P_0$  is the initial phage  
13 input in the lysate (PFU/ml), and  $P_1$  is the titer of free phages (PFU/ml) after cell  
14 infection. Shown are average values and SD of at least 3 independent experiments.

15 (G) *B. subtilis* PY79 and W23 cells were infected with the indicated phages at the  
16 same PFU and the number of plaques was monitored after 20 hrs. Shown is the  
17 number of plaques obtained on W23 cells divided by the number of plaques obtained  
18 on PY79 cells, i.e EOP (efficiency of plating) on W23 cells. Shown are average  
19 values and SD of at least 3 independent experiments.

20

21 **Figure 5. SPO1-m2 exhibits a broader host range**

22 (A-B) SPO1-wt and SPO1-m2 phages were spotted on lawns of *B. amylo* (10A18) (A)  
23 and *B. pumilus* (B) cells ( $10^8$  PFU), and cell lysis was monitored after overnight.  
24 Shown are representative images of at least 3 independent experiments.

1 (C) Infected *B. amylo* (10A18) cells were followed by time lapse microscopy. Shown  
2 are phase contrast images taken at the indicated time points post infection (t=0) with  
3 SPO1-wt (upper panels) or SPO1-m2 (lower panels) (MOI=10).

4 (D) *B. subtilis* (PY79), *B. amylo* (10A18) and *B. pumilus* strains were stained with  
5 ConA-AF488. Shown are phase contrast (left panels) and AF488 fluorescence (right  
6 panels) images of the indicated strains.

7 Scale bars, 1  $\mu$ m.

8 (E) *B. subtilis* (PY79), *B. amylo* (10A18) and *B. pumilus* strains were infected with  
9 the indicated phages (MOI=0.1), and phage adsorption was monitored after 12 min by  
10 PFU/ml on PY79 lawn. Percentage phage adsorption was calculated as follows:  $(P_0 -$   
11  $P_1) \times 100 / P_0$ , where  $P_0$  is the initial phage input in the lysate (PFU/ml), and  $P_1$  is the  
12 titer of free phages (PFU/ml) after cell infection. Shown are average values and SD of  
13 3 independent experiments. SPO1-m2 binding to *B. amylo* and *B. pumilus* was not  
14 significantly different from that of SPO1-wt ( $p=0.07$  for *B. amylo*, and  $p=0.052$  for *B.*  
15 *pumilus*). SPO1-m2 binding to both *B. amylo* and *B. pumilus* was significantly  
16 improved ( $p<0.01$ ).

17

## 18 **Figure 6. A model for host range expansion by phages**

19 Based on our results, we propose the following model for host range expansion by  
20 phages infecting Gram positive bacteria:

21 (A) Wild type phage (i.e. SPO1-wt) recognizes the host species via binding to the  
22 Glc-TA polymers and subsequently injects its DNA into the cell. SPO1-wt phage  
23 cannot infect host cells lacking glucosyl residues or non-host species displaying a  
24 different TA glycosylation pattern.

1    **(B)** The evolved mutant phage, capable of infecting resistant host (i.e. SPO1-m2), lost  
2    its dependency on TA glycosylation, and can directly adhere to the TA polymer  
3    backbone. The evolved phage can infect host cells having mutated or dissimilar TA  
4    glycosylation patterns.

5

## 1 **Supporting Figure legends**

### 2 **Figure S1. Isolation of bacterial strains resistant to SPO1**

3 (A) WT (MH1) strain was infected with SPO1 (MOI=10) and resistant colonies were  
4 scored. Shown are the numbers of phage surviving colonies in 3 representative  
5 biological repeats (out of 7 independent experiments). Each experiment included  
6 several parallel cultures, as indicated by culture number. Of note, the number of  
7 resistant colonies varied considerably between and within experiments.

8 (B) WT (MH1) strain was infected with SPO1 and resistant colonies were isolated.  
9 Shown are various resistant bacterial colonies, M1-M5, streaked over an agar plate  
10 containing SPO1 phages. M1-M2 display full resistance, M3-M5 display partial  
11 resistance, as indicated by the formation of small plaques, and the WT (MH1) strain  
12 shows full sensitivity. The plate was photographed after 20 hrs of incubation at 37°C.

13 (C) Strains WT(MH1), M2(*gtab<sub>116Δ</sub>*), M4(*tagEQ613ns*) and MH14 (*tagEQ613ns*; a  
14 newly constructed M4) were streaked over an agar plate containing SPO1 phages. The  
15 plate was photographed after 20 hrs of incubation at 37°C.

16

### 17 **Figure S2. Phage attachment and infection of TA mutant bacterial strains**

18 (A) SPO1 phages were labeled with DAPI and phage attachment to the indicated  
19 bacterial strains was observed by fluorescence microscopy. Scale bar, 4 μm.

20 (B-D) The indicated bacterial strains were infected with SPO1-wt (B, C) or SPO1-m2  
21 (D) (MOI=0.1), and phage adsorption was monitored after 12 min by PFU/ml.  
22 Percentage phage adsorption was calculated as follows:  $(P_0 - P_1) \times 100 / P_0$ , where  $P_0$  is  
23 the initial phage input in the lysate (PFU/ml), and  $P_1$  is the titer of free phages  
24 (PFU/ml) after cell infection. Shown are average values and SD of at least 3

1 independent experiments. SPO1-m2 binds  $\Delta gtaB$  significantly better than SPO1-wt  
2 ( $p < 0.05$ ).

3 **(E-F)** The indicated bacterial strains were infected with SPO1-wt (E) or SPO1-m2 (F)  
4 (MOI=10) ( $t=0$ ) and cell lysis was followed every 30 minutes by  $OD_{600}$ . Shown are  
5 average values and SD of at least 3 independent experiments.

6 **(G)** WT (PY79) or the indicated mutant strains were infected with the listed phages at  
7 the same PFU, and plaque number was monitored after 20 hrs. Shown is EOP  
8 (efficiency of plating) on the various mutants: [number of plaques on each mutant/  
9 number of plaques on WT]. Results are average values and SD of at least 3  
10 independent experiments. N.A.-not applicable, no plaques were obtained on these  
11 bacterial mutants.

12

### 13 **Figure S3. The ZnuC ABC transporter affects SPO1 infectivity**

14 **(A-C)** Strains WT (PY79),  $\Delta gtaB$  (ET30),  $\Delta znuC$  (MH31) and  $\Delta gtaB \Delta znuC$  (MH33)  
15 were streaked over an agar plate containing (A) SPO1-m2, (B) SPO1-wt, and (C)  
16 SPO1-m2, supplemented with 30  $\mu M$  zinc. Plates were photographed after 20 hrs of  
17 incubation at 37°C. Zinc supplementation suppressed the resistance phenotype to  
18 SPO1-m2 observed by  $\Delta znuC$  cells.

19 **(D)** WT (PY79) and  $\Delta znuC$  (MH31) strains were infected with SPO1-wt or SPO1-m2  
20 (MOI=0.1) and phage adsorption was monitored after 12 min by PFU/ml. Percentage  
21 phage adsorption was calculated as follows:  $(P_0 - P_1) \times 100 / P_0$ , where  $P_0$  is the initial  
22 phage input in the lysate (PFU/ml), and  $P_1$  is the titer of free phages (PFU/ml) after  
23 cell infection. Shown are average values and SD of at least 2 independent  
24 experiments.

1 (E) WT (ET8) or  $\Delta znuC$  (MH35) cells harboring  $P_{xy1}$ -*gfp-gp6.1* were grown in the  
2 presence of xylose (0.25%), infected with SPO1-wt (MOI=10) (t=0), and followed by  
3 time lapse microscopy. Shown are fluorescence images from GFP-GP6.1 at the  
4 indicated time points post infection. Scale bar, 2  $\mu$ m.

5 (F) SPO1-wt and SPO1-m2 phages were utilized to infect lawns of the indicated  
6 strains with or without the presence of 30  $\mu$ M zinc, and infection efficiency was  
7 detected by plaque number. Shown is a representative experiment out of 3  
8 independent repeats.

9

#### 10 **Figure S4. SPO1-m2 infection of various TA mutant strains**

11 (A) Lysis assay of WT (PY79) and the indicated mutant strains infected with SPO1-  
12 m2 (MOI=10) (t=0). Lysis was followed by OD<sub>600</sub> at the indicated time points. Shown  
13 are average values and SD of at least 3 independent experiments. Values for ET30 and  
14 MH25 are an average of 13 and 5 independent experiments respectively, due to  
15 variability in cell lysis time.

16 (B) MH26 ( $\Omega$ *tagE*  $\Delta$ *ggaAB*) (left panels) and MH25 ( $\Omega$ *tagE*  $\Delta$ *ggaAB*  $\Delta$ *ugtP*) (right  
17 panels) strains were grown in the absence (-) or the presence (+) of SPO1-m2  
18 (MOI=10), and cultures were photographed at the indicated time points.

19 (C) WT (PY79) or the indicated mutant strains were infected with the indicated  
20 phages at the same PFU, and the number of plaques was monitored after 20 hrs.

21 Shown is EOP (efficiency of plating) on the various mutants: [number of plaques on  
22 each mutant/ number of plaques on WT]. Results are average values and SD of at  
23 least 3 independent experiments.

24 (D) Shown are phase contrast (left panel) and DAPI staining (right panel) of MH36  
25 ( $\Delta$ *tagO*) cells during logarithmic phase.



1

2 **Figure S5. Investigating the capability of SPO1-m2 to infect various species**

3 SPO1-wt and SPO1-m2 phages ( $10^8$  PFU) were spotted on lawns of the listed strains  
4 and cell lysis was observed after overnight. *B. amylo* (10A18) and *B. pumilus*,  
5 highlighted in red, could be lysed only by SPO1-m2.

6

7 **Figure S6. Spo1-m2 can infect non-host strains**

8 (A) Infected *B. pumilus* cells were followed by time lapse microscopy. Shown are  
9 phase contrast images taken at the indicated time points post infection (t=0) with  
10 SPO1-wt (upper panels) or SPO1-m2 (lower panels). Arrows highlight lysing  
11 bacterial cells.

12 (B-C) SPO1-m2 (left panels) and SPO1-wt (right panels) were labeled with DAPI and  
13 phage attachment to *B. amylo* (10A18) (B) or *B. pumilus* (C) was detected by  
14 fluorescence microscopy. Shown are overly images of phase contrast (blue) and DAPI  
15 fluorescence (green). Arrows indicate phage binding to the cell surface.

16 Scale bars, 2  $\mu$ m.

17

Fig. 1

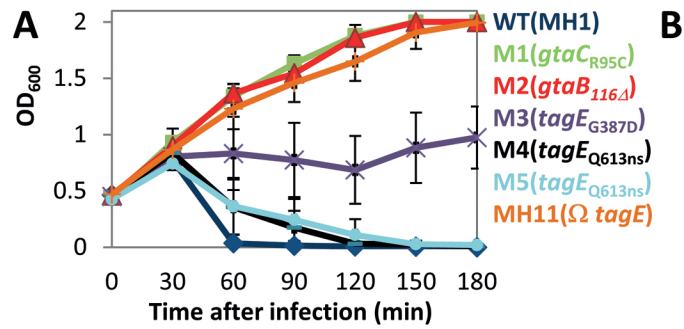

**B**

| Strain     | Mutated Gene | Protein Length | Mutation                   | Allele                        |
|------------|--------------|----------------|----------------------------|-------------------------------|
| M1         | <i>gtaC</i>  | 581aa          | R95C                       | <i>gtaC</i> <sub>R95C</sub>   |
| M2         | <i>gtaB</i>  | 292aa          | Deletion from C 116        | <i>gtaB</i> <sub>Δ116</sub>   |
| M3         | <i>tagE</i>  | 673aa          | G387D                      | <i>tagE</i> <sub>G387D</sub>  |
| M4, M5, M9 | <i>tagE</i>  | 673aa          | Nonsense (Q613-Stop codon) | <i>tagE</i> <sub>Q613ns</sub> |
| M6         | <i>gtaB</i>  | 292aa          | Deletion                   | <i>gtaB</i> <sub>Δ82-85</sub> |
| M7         | <i>gtaB</i>  | 292aa          | Frameshift (F188-end)      | <i>gtaB</i> <sub>188fs</sub>  |
| M8         | <i>tagE</i>  | 673aa          | Frameshift (T331-end)      | <i>tagE</i> <sub>331fs</sub>  |

**C**

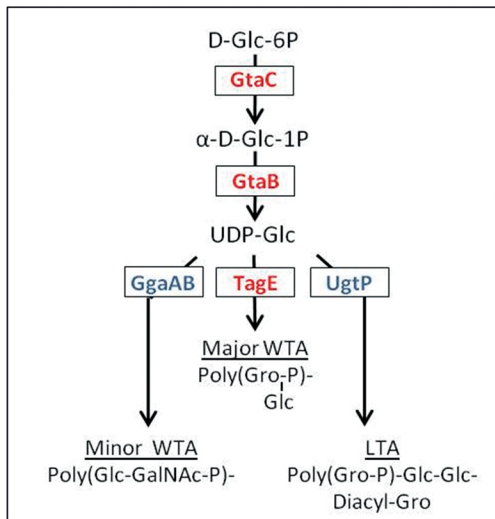

**D**

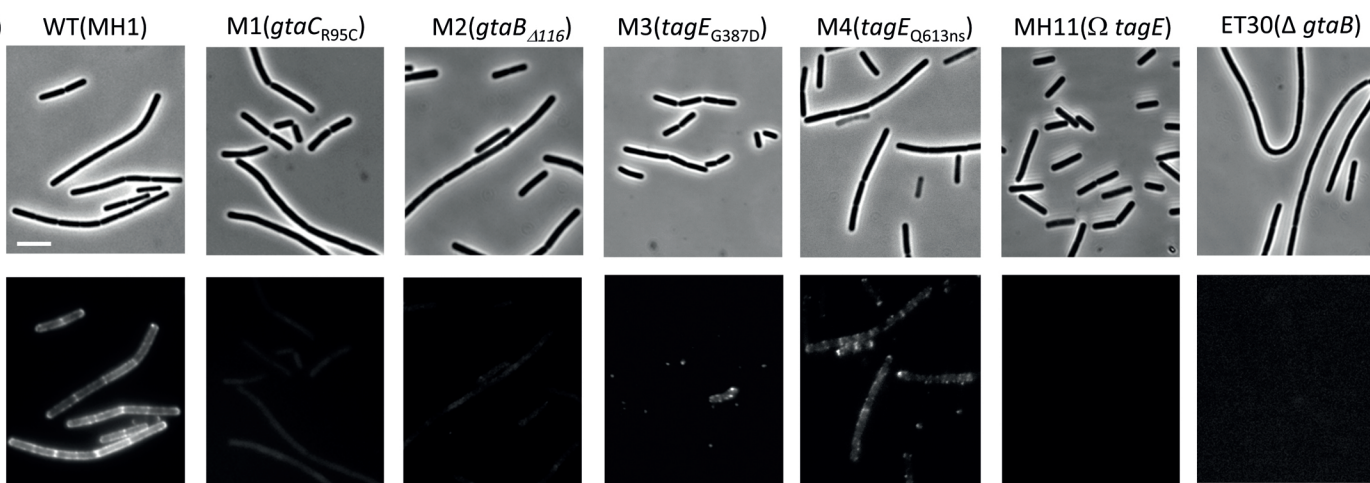

Fig. 2

**A**

| Phage   | Mutated gene  | Protein length (aa) | Changed position (aa) |
|---------|---------------|---------------------|-----------------------|
| SPO1-m1 | <i>gp16.2</i> | 1129                | G 844 E               |
|         | <i>gp18.1</i> | 638                 | Q 496 K               |
| SPO1-m2 | <i>gp16.2</i> | 1129                | D 343 G               |
|         | <i>gp18.1</i> | 638                 | Q 582 K<br>D 583 G    |

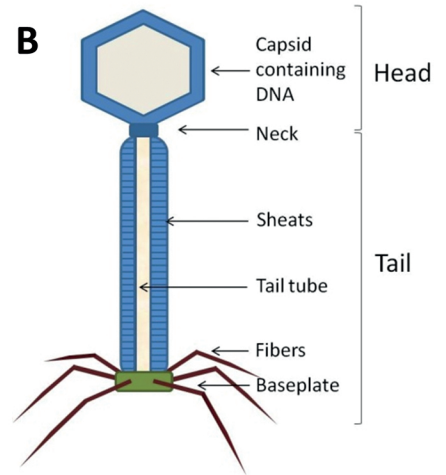

**C**

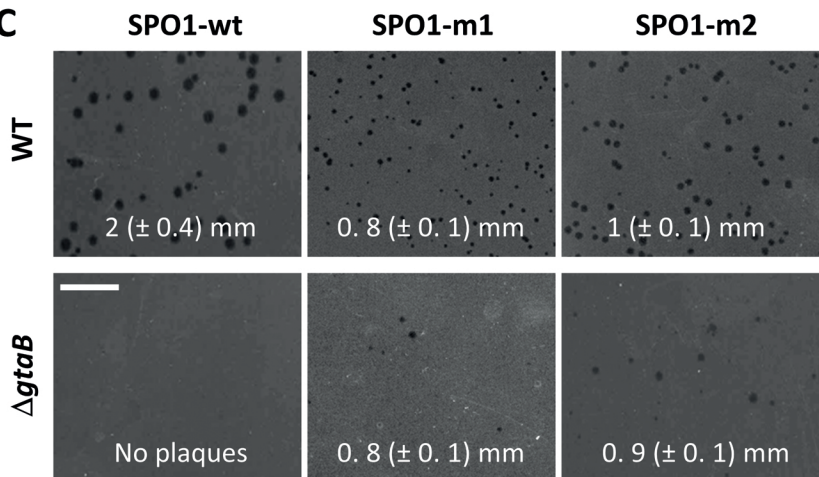

**D**

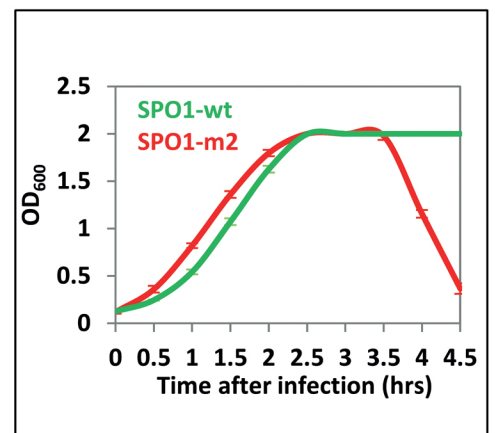

**E**

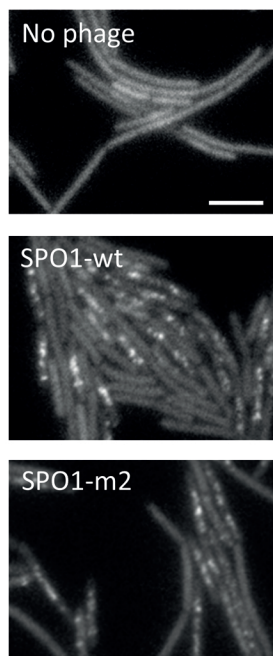

**F**

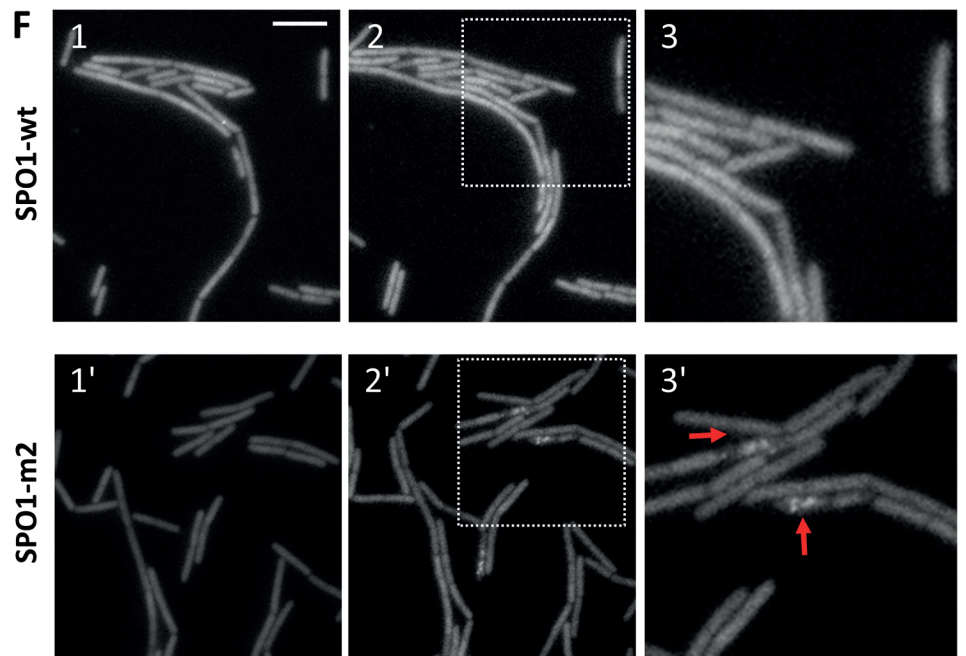

Fig. 3

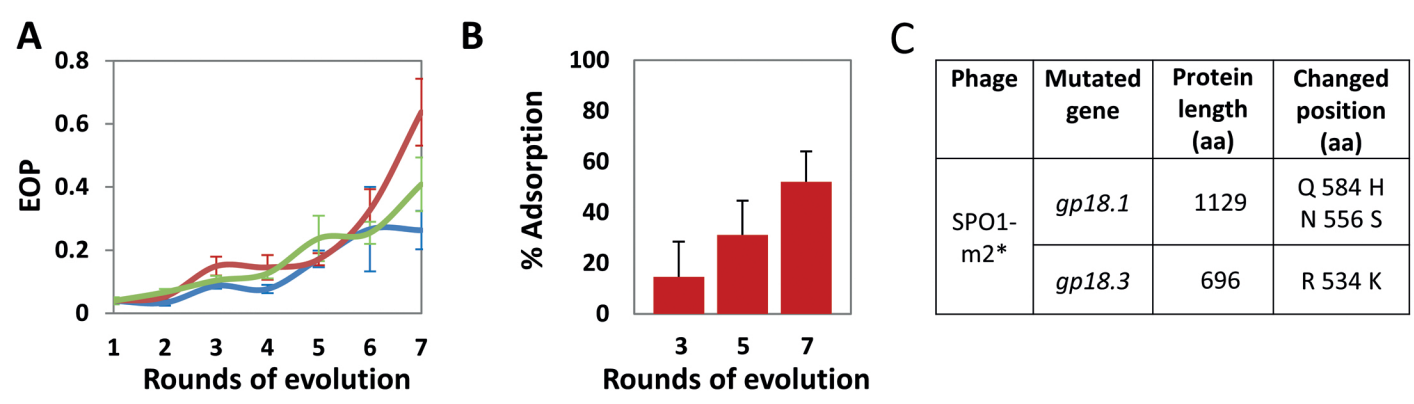

Fig. 4

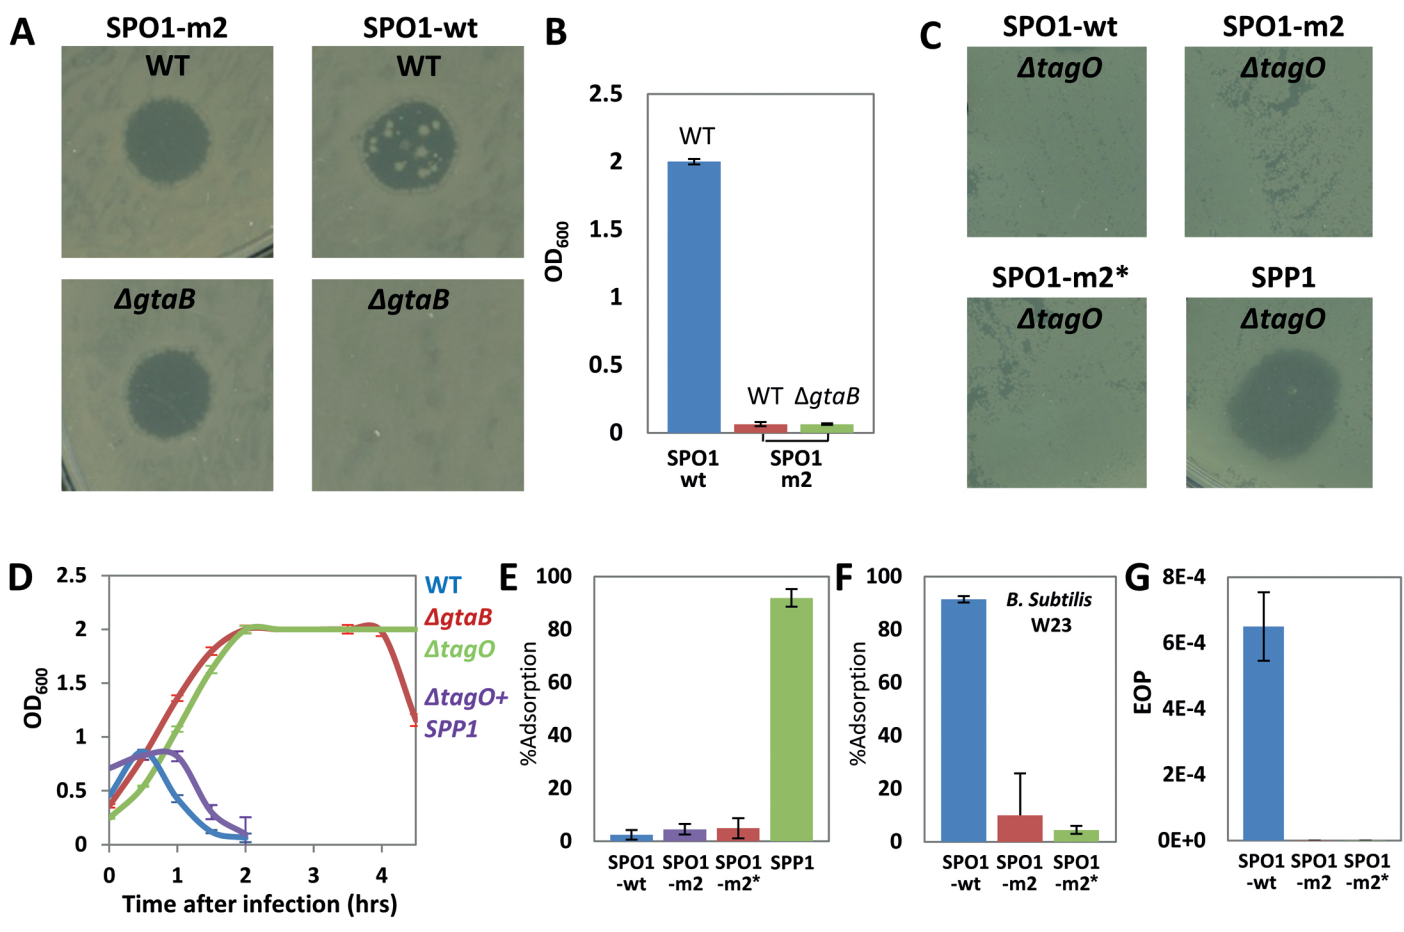

Fig. 5

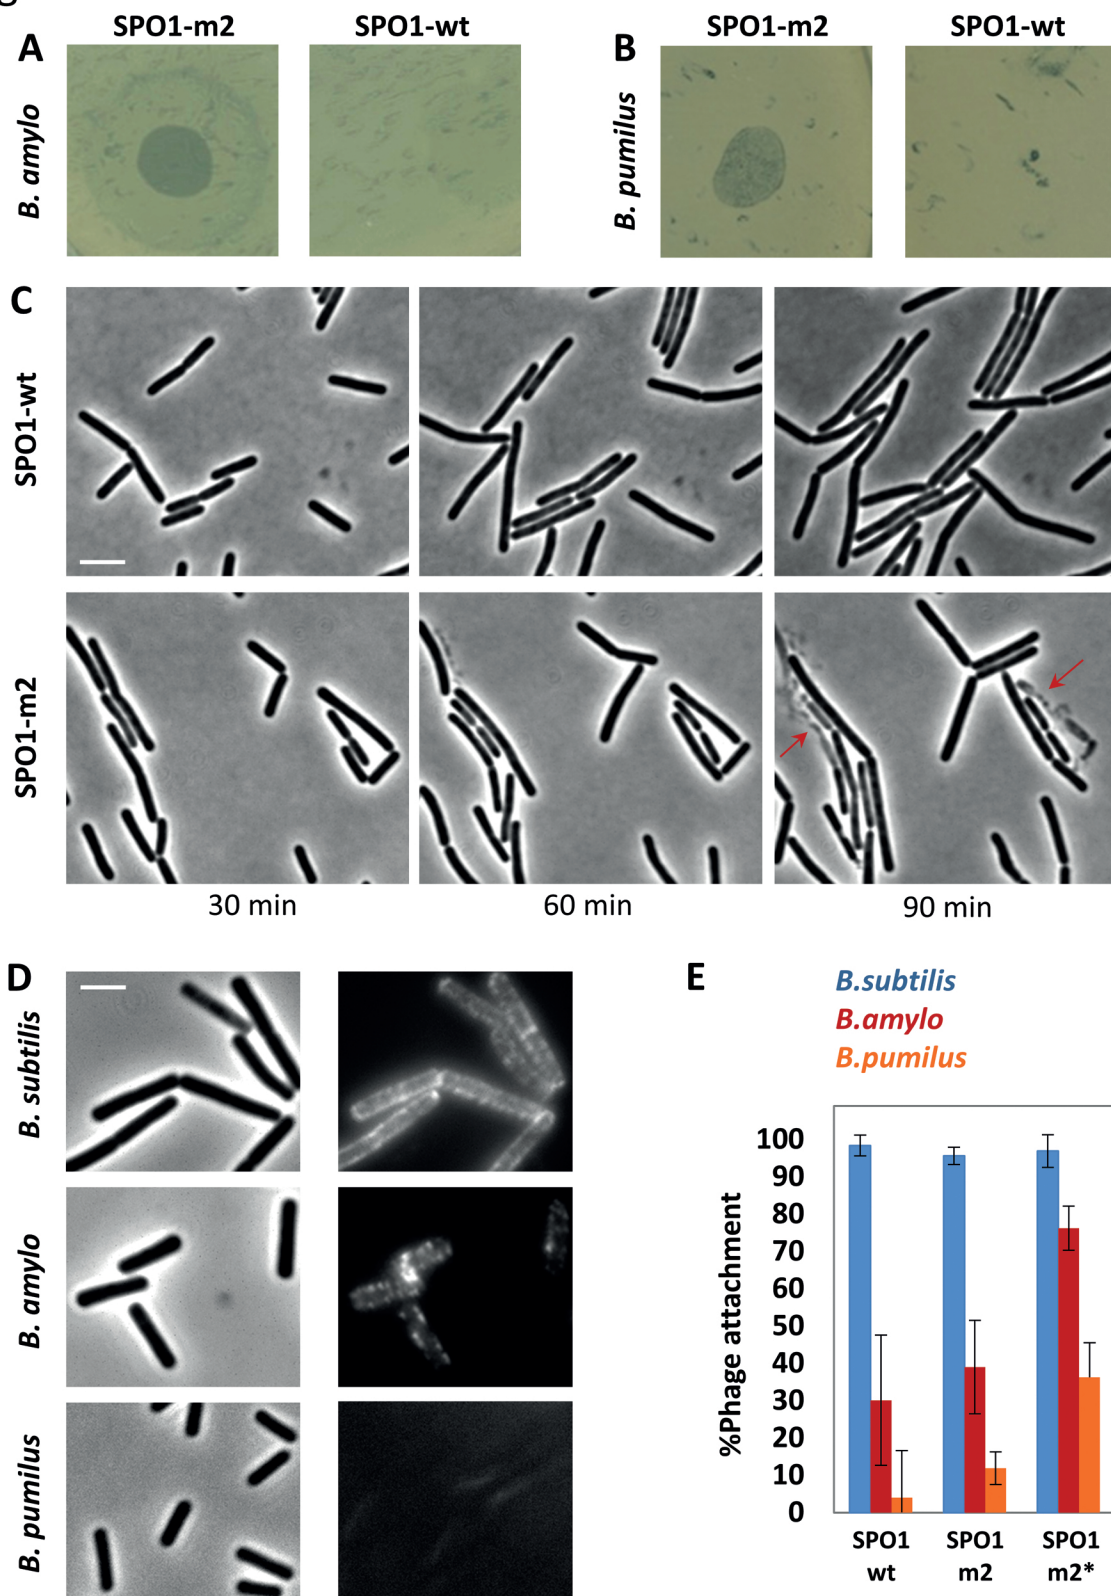

Fig. 6

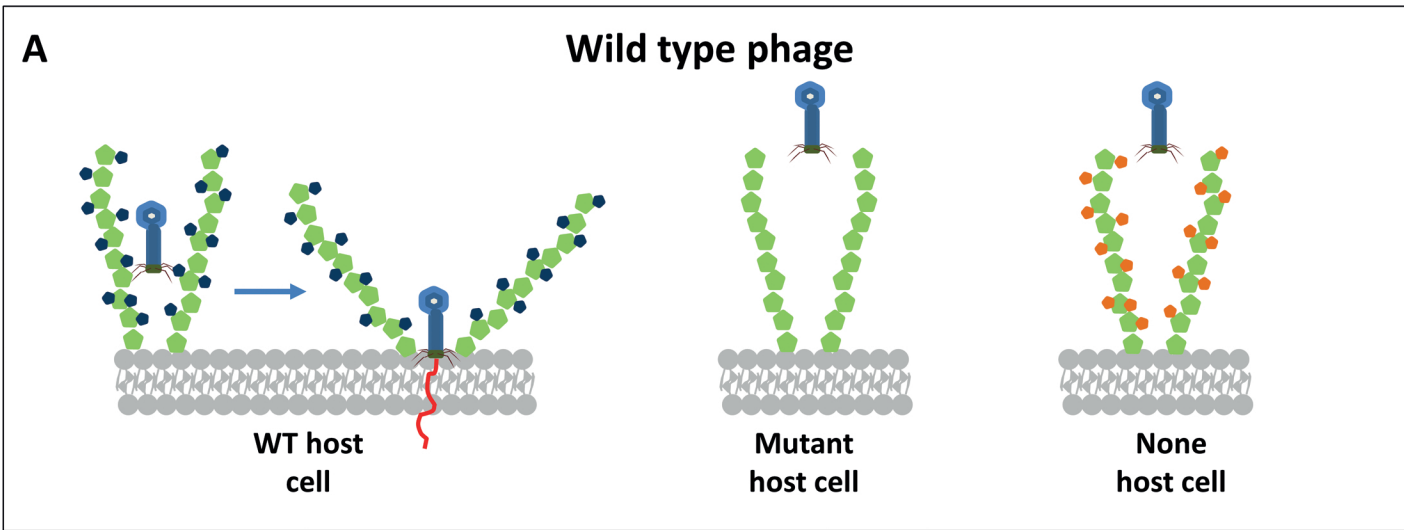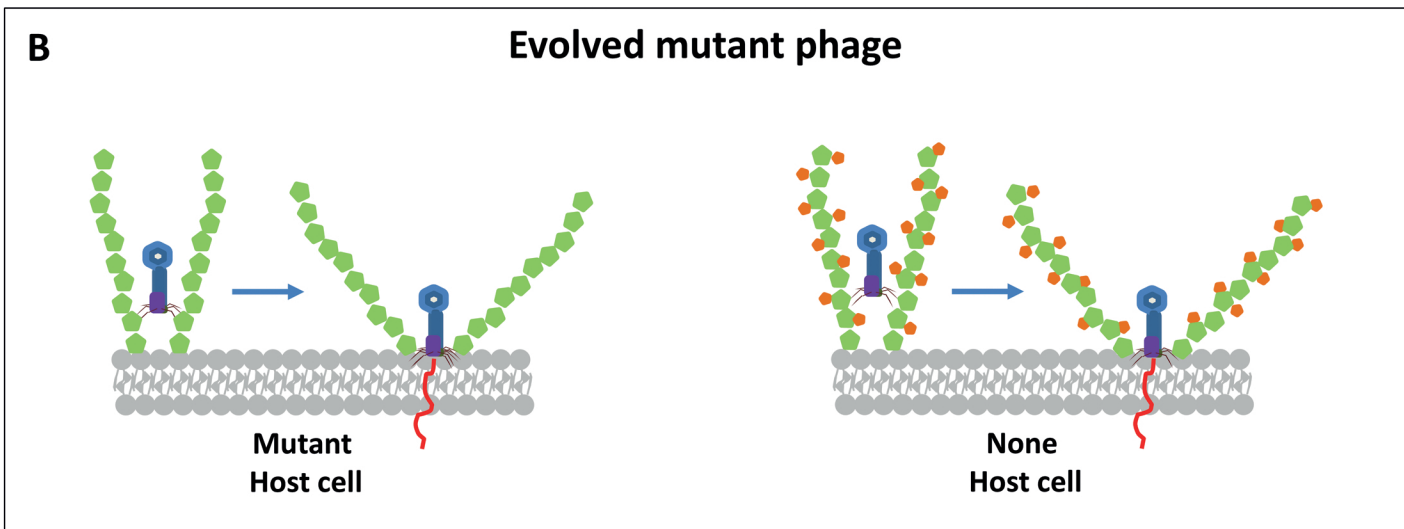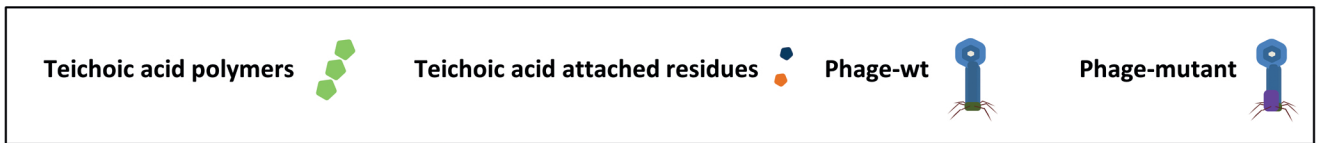

Fig. S1

**A**

| Experiment Number | Culture Number | CFU/ml |
|-------------------|----------------|--------|
| 1                 | 1              | 5      |
|                   | 2              | 228    |
|                   | 3              | 215    |
|                   | 4              | 0      |
|                   | 5              | 0      |
| 2                 | 1              | 516    |
|                   | 2              | 765    |
|                   | 3              | 142    |
|                   | 4              | 614    |
| 3                 | 1              | 3      |
|                   | 2              | 1006   |
|                   | 3              | 250    |
|                   | 4              | 293    |

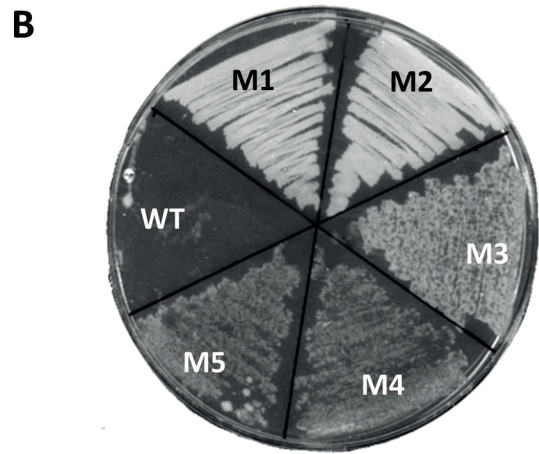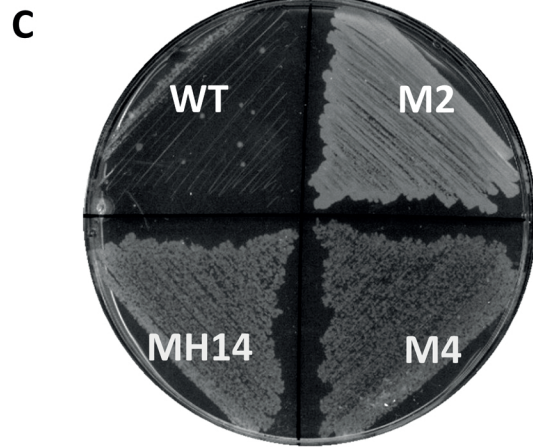



Fig. S2

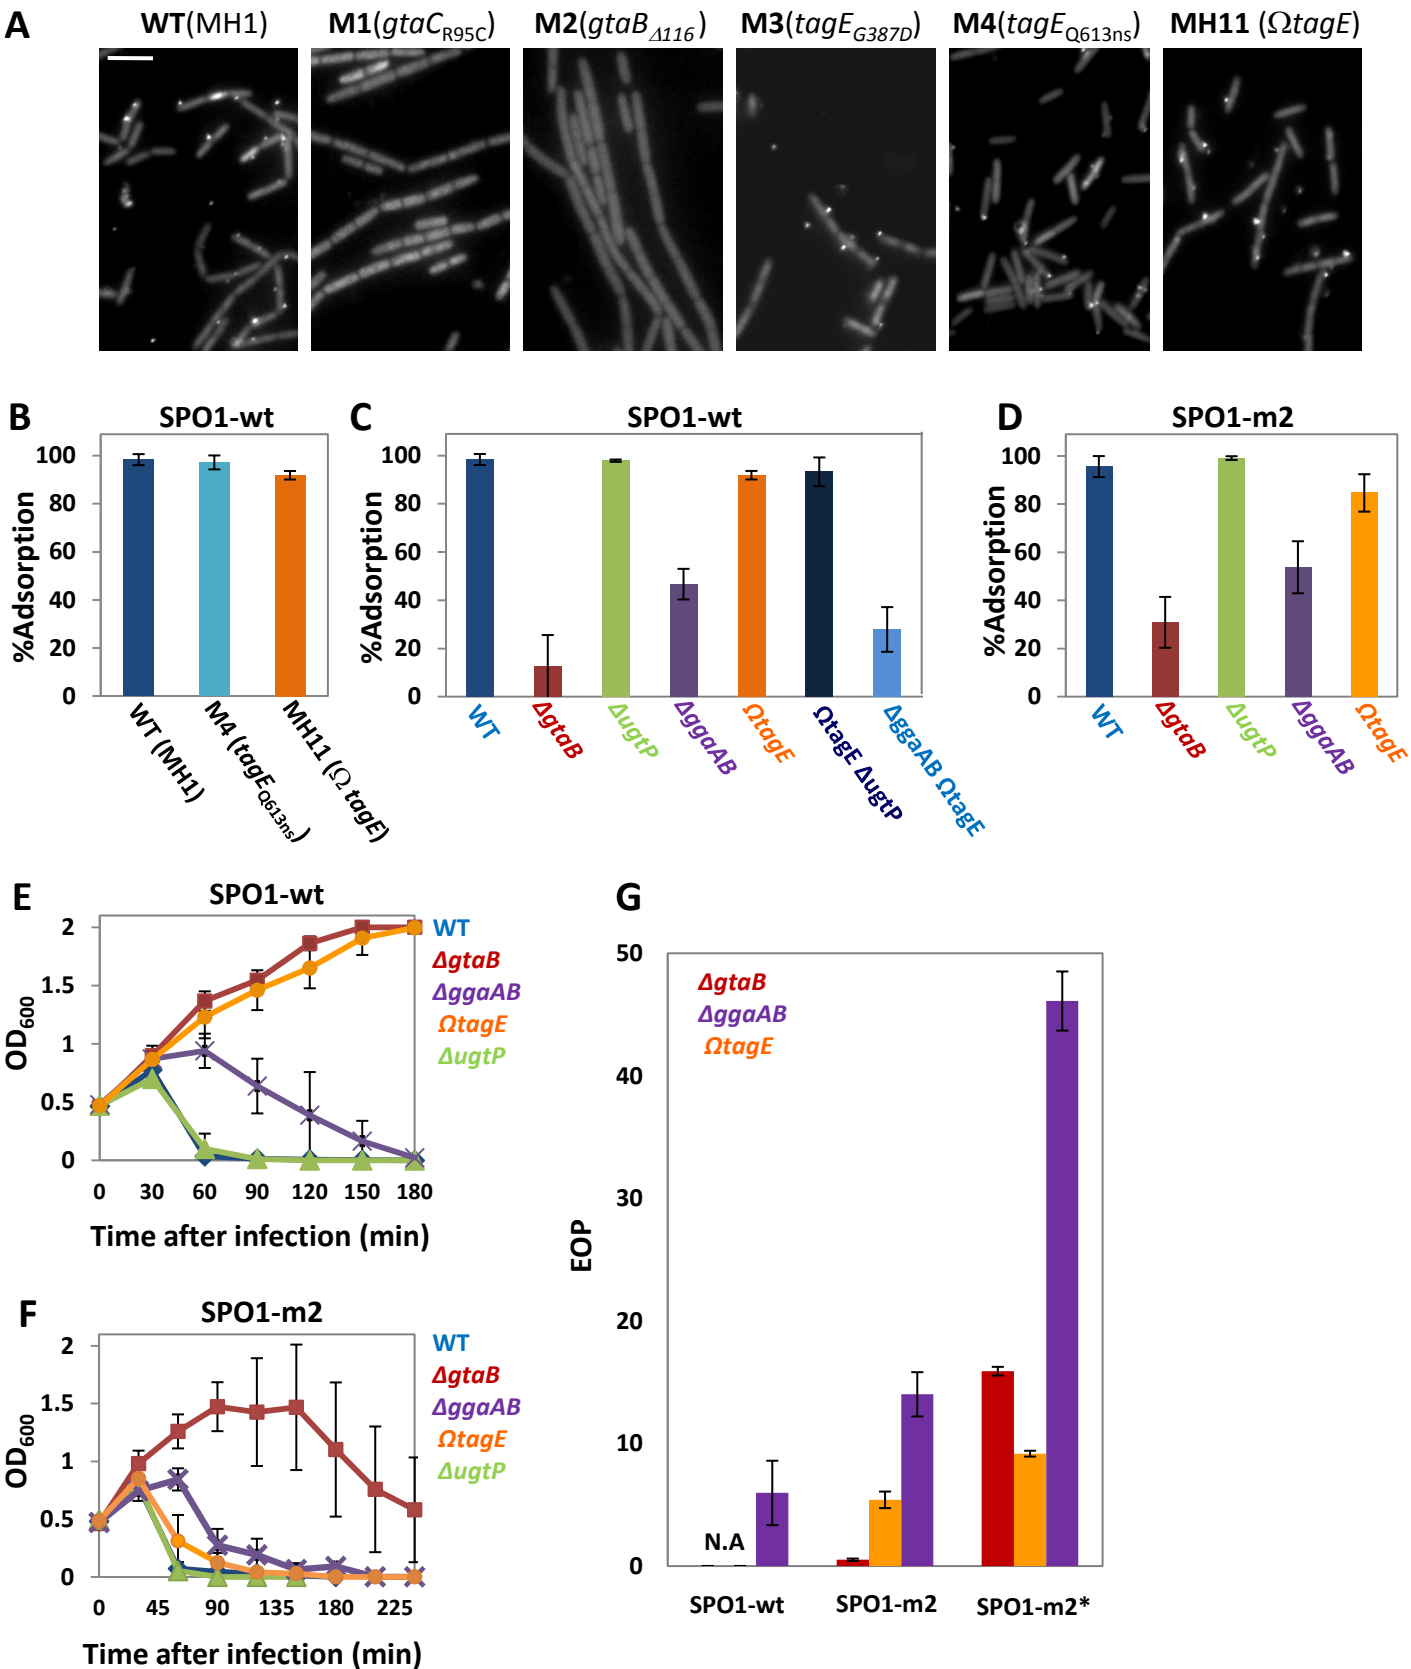

Fig. S3

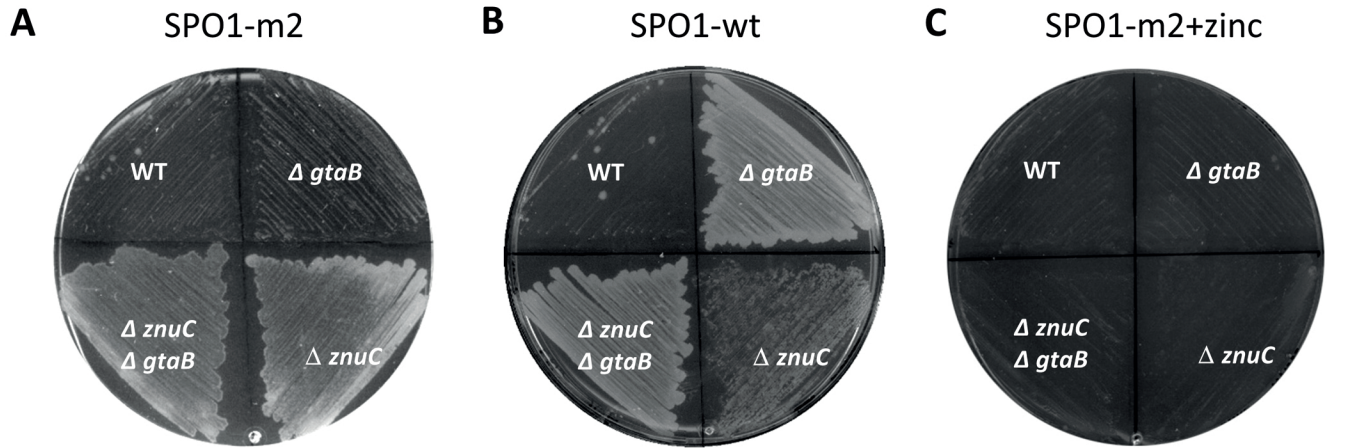

**D** % Phage attachment

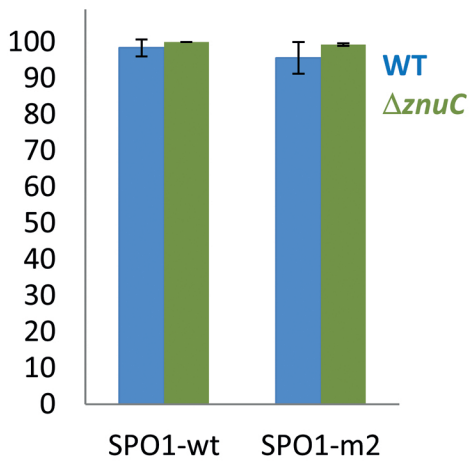

**E**

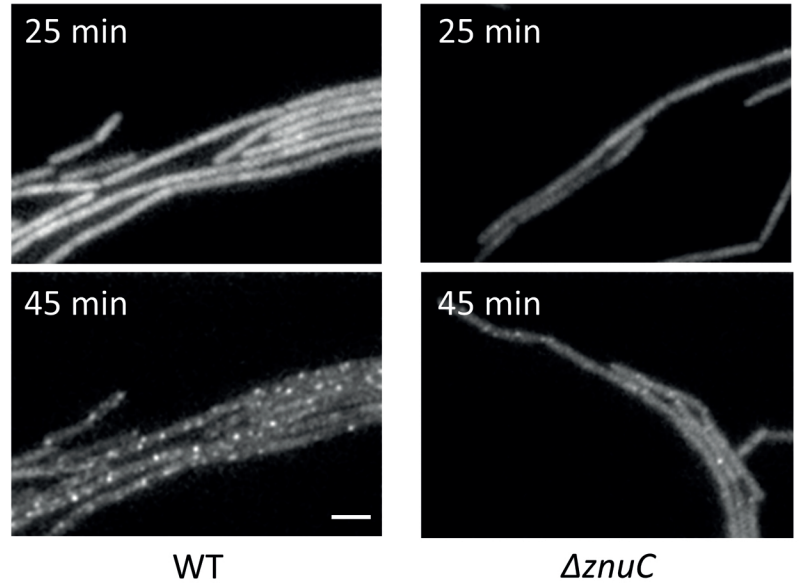

**F**

| Phage \ <i>B. subtilis</i>  | WT                          |     | $\Delta gtaB$ (ET30) |    | $\Delta znuC$ (MH31) |     | $\Delta znuC \Delta gtaB$ (MH33) |    |
|-----------------------------|-----------------------------|-----|----------------------|----|----------------------|-----|----------------------------------|----|
|                             | SPO1-wt (plaques per plate) | 230 | 246                  | 0  | 0                    | 0   | 188                              | 0  |
| SPO1-m2 (plaques per plate) | 178                         | 182 | 30                   | 28 | 0                    | 100 | 0                                | 26 |
| Zinc (30 $\mu$ M)           | -                           | +   | -                    | +  | -                    | +   | -                                | +  |

Fig. S4

**A**

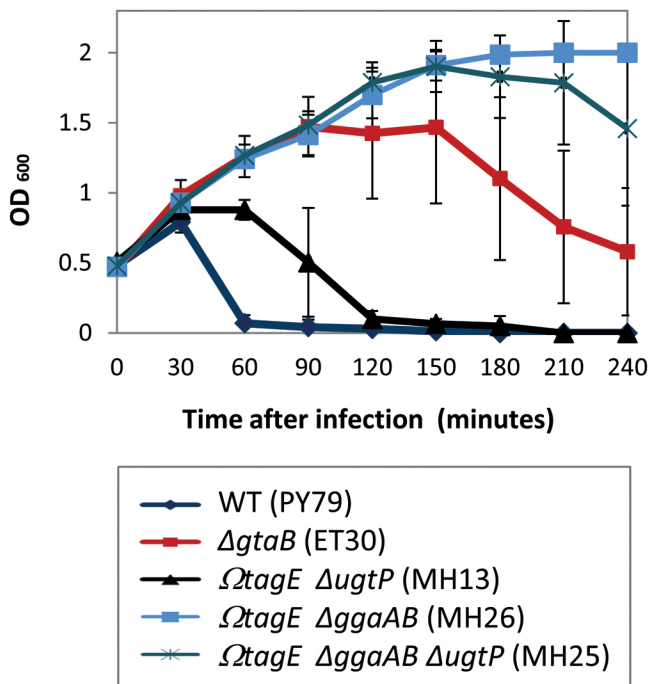

**B**

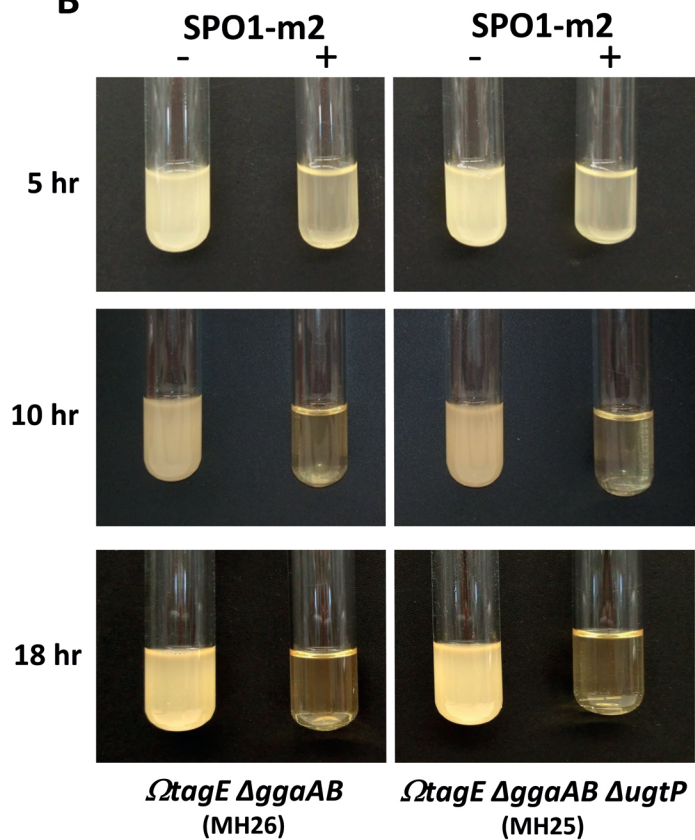

**C**

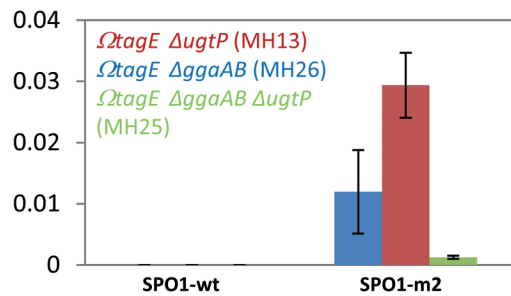

**D**

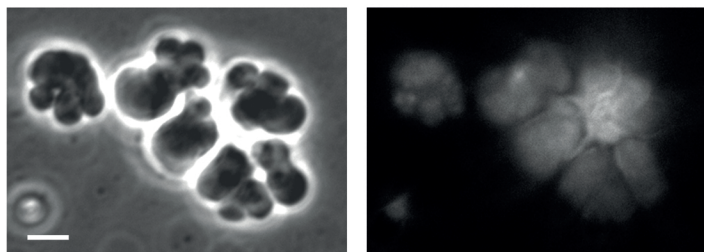

Fig. S5

| Bacterial Strain                       | Lysis +/- |         |
|----------------------------------------|-----------|---------|
|                                        | SPO1 wt   | SPO1 m2 |
| <i>B. infantis</i>                     | +/-       | +/-     |
| <i>B. atrophaeus</i>                   | -         | -       |
| <i>B. cereus</i>                       | -         | -       |
| <i>B. pumilus</i>                      | -         | +       |
| <i>B. megaterium</i>                   | -         | -       |
| <i>B. amyloliquefaciens</i><br>(10A18) | -         | +       |
| <i>B. velezensis</i><br>(FZB24)        | +         | +       |
| <i>B. amyloliquefaciens</i><br>(10A3)  | +         | +       |

Fig. S6

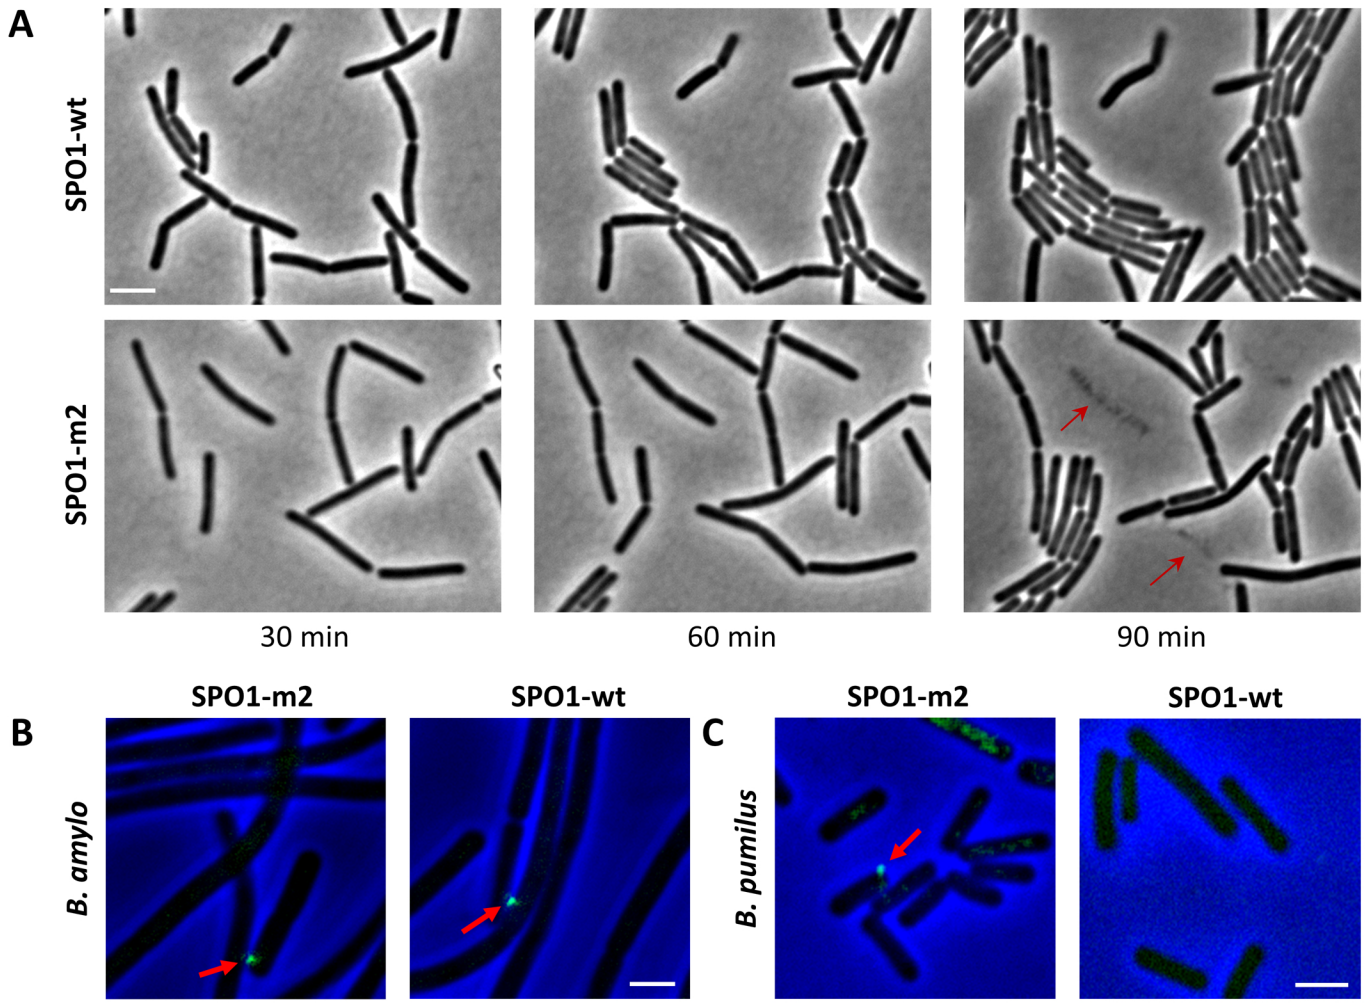

Source: https://www.biorxiv.org/content/10.1101/466383v1.full.pdf
